24 **ABSTRACT**

25

26 The term *biosensors* encompasses devices that have the potential to quantify physiological,  
27 immunological and behavioural responses of livestock and multiple animal species. Novel  
28 biosensing methodologies offer highly specialised monitoring devices for the specific  
29 measurement of individual and multiple parameters covering an animal's physiology as well as  
30 monitoring of an animal's environment. These devices are not only highly specific and sensitive  
31 for the parameters being analysed, but they are also reliable and easy to use, and can accelerate  
32 the monitoring process. Novel biosensors in livestock management provide significant benefits  
33 and applications in disease detection and isolation, health monitoring and detection of  
34 reproductive cycles, as well as monitoring physiological wellbeing of the animal via analysis of  
35 the animal's environment. With the development of integrated systems and the Internet of  
36 Things, the continuously monitoring devices are expected to become affordable. The data  
37 generated from integrated livestock monitoring is anticipated to assist farmers and the  
38 agricultural industry to improve animal productivity in the future. The data is expected to reduce  
39 the impact of the livestock industry on the environment, while at the same time driving the new  
40 wave towards the improvements of viable farming techniques. This review focusses on the  
41 emerging technological advancements in monitoring of livestock health for detailed, precise  
42 information on productivity, as well as physiology and well-being. Biosensors will contribute to  
43 the 4<sup>th</sup> revolution in agriculture by incorporating innovative technologies into cost-effective  
44 diagnostic methods that can mitigate the potentially catastrophic effects of infectious outbreaks  
45 in farmed animals

46

47 **Keywords: Biosensing; Nanotechnology; Precision livestock farming; disease diagnostics**

48 **1. Introduction**

49

50 Advances in engineering research and biomaterials, coupled with the decreasing costs of  
51 electronic technologies, have resulted in the emergence of ‘sensing solutions’ and smart  
52 computing technologies that include internet and cloud-based connectivity to develop integrated  
53 and networked physical devices for data collection and analysis. These systems are equipped to  
54 automatically collect data on physiological parameters, farm environment, production measures  
55 and behavioural traits.

56

57 In the modern world, new diseases that threaten animals’ health emerge every year. There is  
58 currently a lack of reliable, cost-effective diagnostic tests for early detection of diseases in  
59 farmed livestock animals. Biosensing technologies have the potential to address these problems  
60 by developing innovative diagnostic tools for the rapid detection of key health threats within the  
61 agri-food livestock sector.

62

63 There are numerous factors that affect food production and have an influence on food security  
64 around the world. By 2050, food demand is expected to increase by 70%, and meat production  
65 will increase by 50%, making agri-food and livestock key industries for future growth  
66 (Alexandratos and Bruinsma, 2012). Health threats to animal populations can disrupt food supply  
67 chains and commerce with potentially long-lasting effects on human health, as well as economic  
68 impacts. With novel infectious agents and global pandemic factors on the rise in farmed  
69 livestock industries, efficient and timely strategies for monitoring and predicting risks are

70 crucial. With current technology, detecting diseases in the early stage requires time-consuming  
71 and expensive laboratory tests. There is a need for detection tools that can predict when an  
72 incident is likely to occur and in what population, inform diagnosis and treatment options, and  
73 forecast potential impacts on a given population (both human and animal). Furthermore, such  
74 technologies must be accurate, affordable and broadly available. Strengthened laboratory and  
75 field capabilities are needed to support these capacities. Diagnostic tools provide crucial  
76 information to surveillance programs in diverse operational contexts, including networks and  
77 reference diagnostic laboratories associated with the World Organization for Animal Health  
78 (OIE), the United Nations Food and Agriculture Organization (FAO), and the Canadian Food  
79 Inspection Agency (CFIA). These systems not only integrate the data on individuals and groups;  
80 they can also help with the decision-making process by assisting in the early detection of health  
81 issues and wellbeing problems in individual animals. These integrated systems will also help in  
82 the implementation of corrective measures and improvements in management processes for  
83 animal husbandry practices. The biosensor market for the year 2013 was valued at US \$11.39  
84 Billion and is expected to increase to US\$22.68 Billion by 2020. This growth in the biosensor  
85 market and associated applications is attributed to an increase in the demand for point-of-care  
86 testing. Furthermore, non-invasive health monitoring is also driving the growth and development  
87 of nanotechnology-based biosensors (Research, 2014). The precision farming market, important  
88 in livestock management, is expected to grow from USD 3.20 Billion in 2015 to USD 7.87  
89 Billion by 2022 (MarketsandMarkets). The driving socio-economic and environmental factors  
90 that are expected to further the research and development to provide food for the growing human  
91 population are detailed in Figure 1.

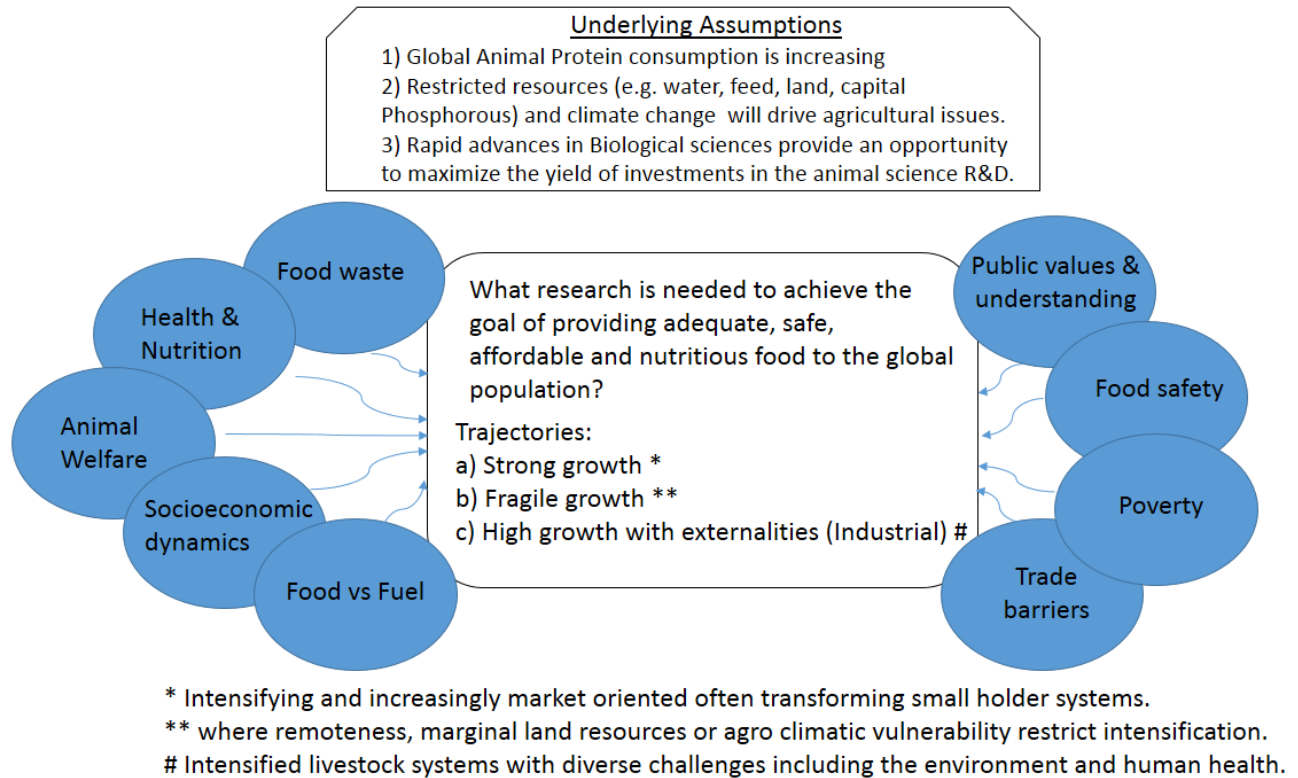

92  
93

94 **Figure 1. Schematic representation of environmental and socio-economic factors impacting**  
95 **future food production. Source: Force et al., (2015).**

96  
97

98 The market for point-of-care testing in veterinary diagnostics is expected to increase at a  
99 compound annual growth rate (CAGR) of 18%, reaching US\$6.71 Billion by 2021. Novel  
100 diagnostic tools and disease modelling will enable decision-making and investigate the rapid  
101 diagnosis of epidemic and emerging diseases of farmed animals. The nanotechnology approach  
102 in developing biosensing tools offers direct benefits through simpler testing, smaller size, greater  
103 accuracy, faster results, and faster responses to key health threats in the farm animal sector.

104

105 We have entered a ‘fourth revolution’ in agriculture. This denotes the proliferation of new  
106 technologies including the Internet of Things, precision agriculture and mobile apps for disease  
107 surveillance. This review study will covers the technologies that will improve the capacity and  
108 efficiency of novel infection diagnosis, providing information needed to formulate sustainable  
109 risk assessment-based infection control programs for agri-food and livestock producers.

110

111 In this review, the focus relies on the emergent bio-sensing technologies that have the ability to  
112 transform management in the livestock industry and the methods associated with it. One of the  
113 salient features of biological, agricultural and environmental applications of nanotechnology is  
114 that the nanoscale devices and systems are of the same size-scale as biomolecules. While  
115 conventional sensors have been used in livestock monitoring, and as tools to assist in health  
116 monitoring and disease diagnosis, nanobiosensors have the ability to multiplex the bioassays on-  
117 site, thereby eliminating the need for the transportation of biological samples to centralised  
118 laboratories for analysis. Integration of these sensors for wireless data transfer via a server or  
119 through cloud-based systems would enable access to the analysed data for any internet-enabled  
120 device. Nanobiosensor applications will not only reduce the incumbent costs for reagents, sample  
121 handling, analysis times and transportation costs, but will also help in adapting and promoting  
122 sustainable agricultural techniques and ethical handling of livestock.

123

124 These technologies shall focus on the non-invasive methodologies to assess animal welfare by  
125 quantifying the stress and metabolic disease biomarkers, welfare assessment based on activity of  
126 the animals (monitoring oestrus and lameness detection to maximise animal production) and  
127 sensors for temperature and pH sensing (to determine calving alert and rumen function).

128 Furthermore, various non-invasive sensing technologies for early disease detection shall help in  
129 saving animals' lives as well as reducing expenses for the farmers. A combination of these  
130 technologies and the use of 'smart' husbandry support systems will ensure maximum  
131 productivity while improving the wellbeing of farm animals (Caja et al., 2016). Non-invasive  
132 technologies for the chemical and biological analysis of samples from livestock, food and feed  
133 can rapidly provide detailed information to evaluate the safety of various biological samples.  
134 Biosensors equipped with robust data collection and integration infrastructure will be able to  
135 realise this potential and shall become vital elements in real-time analysis of industrial  
136 agriculture. Not only will such systems help in maximising the utilisation of resources for  
137 farming; they will also allow for an evaluation of individual and group behaviour of animals.  
138 Development of on-site biosensing technologies will enable rapid, cost-effective and meaningful  
139 monitoring of dietary inputs, environmental conditions, genetic makeup, performance,  
140 metabolism, welfare and physiological state of animals.

141

## 142 1.1 Biosensing – Taking a systems biology approach

143

144 The application of biosensors in animal husbandry and agriculture will increase competitiveness  
145 in the ever-changing global economy. The enormous amount of data generated by the continuous  
146 monitoring shall generate new knowledge on animals' health and physiology and is expected to  
147 result in the development of technologies that will improve efficiency of animal production,  
148 better usage of dietary resources, improved health and welfare of animals through improved  
149 animal management, and reduced output of waste per unit of food product, thereby decreasing  
150 the impact of animal production systems on the environment.

151 Taking a systems biology approach to animal productivity and wellbeing is the way forward in  
152 animal husbandry, as well as in agriculture. It will also be indicative of future human  
153 performance and wellbeing initiatives. Collecting individual animal data as opposed to just ‘herd  
154 management’ will be necessary to monitor the wellbeing of individual animals as well as animal  
155 groups, and will help in identifying diseased animals sooner so as to provide healthcare and  
156 prevent any disease outbreaks. Moving agriculture (animal productivity and wellbeing) on a  
157 parallel course with human medicine and social science (human productivity and wellbeing) will  
158 enable the determination of multi-parametric data on physiological and environmental factors  
159 affecting animal welfare and productivity. This integrated database can be used to implement  
160 best farm practices to ensure animal welfare and productivity and to predict animal behaviour.  
161 Biosensing applications for livestock management and welfare will foster productive, value-  
162 added partnerships in ways that will lead to social, health, environmental and economic benefits.  
163 The approach to develop new solutions ranges from involving molecules to ecosystems, from  
164 nanotechnology to big data analysis and management, and from microbes to sheep to human  
165 populations. Moreover, real-time monitoring of animal health and assessment will have a direct  
166 impact on animal productivity and better utilisation of resources. The future of biosensors lies in  
167 utilising the comprehensive knowledge of animal physiology, genetics, environmental sciences  
168 and animal nutrition, and integrating this knowledge in a meaningful way will aid in the  
169 translation into real commercial and societal benefits.

170

171

172



## 173 1.2 Integrated in “decision support systems”

174

175 Animals contribute to the human society in a number of different ways. These include being a  
176 source of food, acting as models for studying human metabolism and diseases, and providing  
177 companionship and services. However, considering that the human population is expected to  
178 surpass 9 billion by 2050, feeding the population represents a formidable challenge. The global  
179 demand for food is expected to increase by more than 50%, while the consumption of animal  
180 food and food products is expected to rise by 73% by the year 2050 (Alexandratos and  
181 Bruinsma, 2012). The increase in human population demands increased availability of food using  
182 sustainable methods and implementation of strategies to increase animal productivity and  
183 agricultural production. It also demands the strengthening of legal systems to ensure sustainable  
184 food chain management. In a society increasingly concerned with the welfare of animals,  
185 methods to ensure ethical practices for animal rearing and animal wellbeing need to be  
186 implemented.

187

188 As the global demand for high-quality animal protein increases, it will result in a competition for  
189 limited food and feed sources from plants, further pressuring the agricultural industry to increase  
190 productivity of food and feed crops per unit area of arable land. The environmental impacts of  
191 livestock production (e.g., on soil, water, atmosphere and forest reserves) are key challenges to  
192 bear in mind as we devise plans and policies to manage and further develop the production  
193 systems that are environmentally sustainable, economically viable, ethically acceptable, and  
194 provide wholesome and nutritious food for animals and humans on a global scale. These  
195 challenges undoubtedly demand effective, rapid application of our cumulative knowledge, and

196 innovative technologies in managing and caring for animals. Moreover, strong scientific bases  
197 for environmental policies, assessment of food attributes, safety of animal foods, policies and  
198 regulations governing animal management and welfare guidelines must form an essential  
199 platform for devising future technologies. Integrating data and knowledge gained from decades  
200 of research in environmental sciences, animal husbandry, agricultural practices and animal  
201 nutrition and behaviour with the modern integrated electronic systems will play a pivotal role in  
202 the optimisation and management of animal health and wellbeing (e.g., precision livestock  
203 management) and to improve sustainability of the supply chain for feed and food production.

204

205 This integration will be handled by decision support systems, which, to be most effective, must  
206 be robust under varying conditions; include technologies for rapid (automated) data collection  
207 via wireless data transmission systems (Ruiz-Garcia et al., 2009) (i.e., animal and environmental  
208 sensors); have substantial computing capacity for data analyses; have systems optimised to  
209 inform decision making and be reasonably easy to operate. The next breakthrough will be for  
210 these systems to use ‘real-time biometry,’ functioning in real time to monitor and control  
211 genotype, environment, wellbeing, productivity and animal product quality.

212

213 Development of novel methods for the real-time assessment and management of animal  
214 productivity and wellbeing is essential for investigating how the health-related parameters are  
215 affected by diet, animal husbandry, environmental factors, and genotype by environmental  
216 interactions. One of the key aspects of managing an animal’s environment will be to optimise  
217 feed ingredients and food quality (i.e., the most critical environmental factor), while maximising  
218 the use of co-products. The application of these novel integrative technologies shall be of interest

219 primarily to the small livestock (chickens, pigs, fish, sheep), as well as companion animals (cats  
220 and dogs).

221

222 The precisely controlled small-scale experimental investigations on these species, focussed on  
223 improved understanding of physiology, are likely to be scaled up to pilot-scale and eventually  
224 result in future commercial applications. As for the livestock species, the quality of final product  
225 like meat, milk, eggs, etc. will require careful consideration for quality, with the ultimate aim of  
226 commercialisation of these integrated systems to be adapted on a larger world-wide scale where  
227 data and inputs from animals are directly incorporated for use in the management software.

228

### 229 1.3 Biosensors will manifest themselves as indispensable tools in animal husbandry

#### 230 1.3.1. Innovation and development for new approaches

231 Future developments in biosensors are expected to result in the development of new  
232 methodological and technological approaches to measuring dynamic changes in real time, with  
233 respect to the changes in physiological state and metabolism (e.g., gastrointestinal flora,  
234 circulating levels of anabolic and catabolic hormones, immune function, gene expression). This  
235 is to better understand the factors influencing animals' responses, and to develop solutions (e.g.,  
236 husbandry practices, technology and associated decision support system) that improve  
237 productivity and/or wellbeing of these animals.

238

#### 239 1.3.2. Real-time data acquisition and analysis

240 Monitoring of real-time autonomic responses (e.g., respiration rate, heartrate and heartrate  
241 variability, blood pressure, changes in peripheral blood flow) and defence-related reflexes (e.g.,

242 startle) using novel biosensing tools will help to investigate how housing, diet and genotype  
243 affect animals' resiliency to stressors. These sensors will help in the understanding of factors that  
244 influence the wellbeing of animals, and in the development of solutions (e.g., husbandry  
245 practices, genotype selection) that improve the welfare of livestock and companion animals.  
246 Advances in wearable or imprinted biosensors that are flexible and allow data transfer remotely  
247 will be of special significance in this advancing area (Neethirajan, 2017) .

248

#### 249 1.3.3. Rapid characterisation of food and feed

250 Biosensors shall be used to develop approaches enabling the rapid, accurate characterisation of  
251 dietary inputs and final products (meat, eggs, milk) in terms of nutrient content (total and  
252 bioavailable), anti-nutritional factors and bioactive components, as well as chemical and  
253 microbiological contaminants, with the aim of implementing this technology at the level of the  
254 commercial feed mill or animal food product processing plant. On the other hand, they would  
255 also help in the decision-making process to alter the composition of feed to the animals in case  
256 the animal products deviate from the expected nutritional status.

257

#### 258 1.3.4. Animal trait analysis and selection of robust breeds

259 Biosensing may also help to select special animal breeds that are robust and resilient to  
260 environmental stressors by enabling rapid assessment of the impacts of animal genotype and  
261 environmental factors at different life stages. Such assessment would yield critical knowledge to  
262 better understand genotype by environment interactions, in order to improve production  
263 efficiency and animal wellbeing. The developments in biosensing will also help us better predict  
264 and manage the impacts of climate change on animal agriculture over the next several decades.

265 1.3.5. Enabling planning of energy budgets and reduction of environmental impact

266 The data collected and analysed using biosensors can assist in constructing detailed nutrient,  
267 energy and elemental budgets for diverse livestock species at different life stages in response to  
268 modulation in diet composition and environmental conditions, allowing precise management and  
269 efficient usage of nutrients and minimisation of waste outputs. This will have a direct impact on  
270 the efficient management of feed inputs and water resources while reducing the cost of  
271 production, wastages and environmental footprint. For example, real-time monitoring of cattle  
272 movement can provide information on the quality and quantity of forage, and the ability to  
273 determine required changes to the grazing systems. Monitoring variables like the consumption of  
274 water can provide insights into feeding behaviour, as well as the interaction between grazing  
275 systems management and this behaviour. Quantifying animal water consumption within a  
276 grazing environment can help to identify the impact of animal grazing on water quality, as well  
277 as land utilisation. (Davis, 2007a; Davis, 2007b)

278

279 1.3.6. Development of mathematical algorithms for better understanding of complex biological  
280 systems and their interaction with the environment

281 In the present day and age of big data, the data from animal farms is expected to help in the  
282 development of advanced bio-mathematical models that are able to integrate data from the  
283 aforementioned scientific research efforts and theoretical understanding of complex biological  
284 systems. These models and simulations will allow for an improved quantitative appreciation of  
285 the scientific and management aspects of animal agriculture. These will enable the assessment of  
286 changes in the system with respect to different production, genetic selection, nutritional and  
287 environmental factors. Ultimately, these models will help to identify approaches and strategies to

288 improve the productivity, efficiency and wellbeing of animals and mitigate the potential negative  
289 environmental impacts of livestock production. These models will also provide the basis for the  
290 development of the specific algorithms required by a variety of decision support systems.

291

292 Current research and development in the field of biosensors for animal health management  
293 focusses on innovative non-invasive, wearable sensors equipped with electronic systems for data  
294 collection and transmission of data wirelessly. For specific areas where wearable sensors cannot  
295 be multiplexed, especially in disease diagnosis, the development of portable hand-held systems  
296 with immediate readout of results will enable fast decision-making processes and help in rapid  
297 management of animal diseases. For example, non-invasive screening has been applied to the  
298 detection of foot-and-mouth disease using hand-held air samplers with electrostatic particle  
299 capture. In this case, infectious viruses are captured and subjected to analysis by real-time PCR  
300 (polymerase chain reaction). Such biosensors can hasten the process of monitoring, diagnosis  
301 and isolation of contaminated livestock in epidemiological contingencies (Christensen et al.,  
302 2011; Wilson, 2015).

303

304 On the one hand, in the field, integrated biosensors will enable intensive (frequent and rapid)  
305 evaluation of all aspects affecting an animal's behaviour, genetics and physiology, as well as  
306 dynamic changes in metabolism and welfare. On the other hand, they will help manage the  
307 production and analysis of the animal's food composition and help in rapid screening of diseases,  
308 which at present cost billions of dollars annually to the livestock industry worldwide. For  
309 example, application of nanobiosensors for rapid detection of foot-and-mouth disease in swine  
310 has a potential to save costs as well as prevent the spread of infection to the uninfected animals.

311 Advancements in biosensing technologies is also expected to focus on the use of non-destructive  
312 chemical analysis technologies, such as near infrared spectroscopy (NIRS), nuclear magnetic  
313 resonance spectroscopy (NMRS) and tunable diode laser absorption spectrometry (TDLAS) for  
314 the rapid and detailed evaluation of a biological sample's chemical composition and safety.

315

316 All these exciting technologies need to be developed for seamless performance and validation,  
317 before they can be used routinely in research and, ultimately, in a commercial setting. Use of  
318 surgically modified animals (e.g., multiple intestinal cannulations, arterials/venous catheters,  
319 heart rate telemetry devices) for serial sampling to correlate physiological and metabolic  
320 indicators with other variables (e.g., the non-invasive monitoring of behaviour and stress  
321 responses, e.g., thermal imaging to assess changes in blood flow). This intensive collection of  
322 data from various sensors and complementary analyses will generate a vast magnitude of  
323 information, which will need to be effectively collected, compiled, synthesised, securely stored  
324 and analysed using a series of advanced statistical, bioinformatics and mathematical modelling  
325 approaches. This will require the implementation of a well-integrated and robust data collection,  
326 storage and computing infrastructure.

327

## 328 **2. Monitoring jaw movement of cattle to know the grazing efficiency**

329 Cattle grazing behaviour requires individual monitoring of cattle based on three important  
330 parameters, including the location of the animal, analysing animal posture and the movement of  
331 the animal, especially movements such as walking and movement of the jaw (Herinaina et al.,  
332 2016; Nadin et al., 2012). Jaw movements define the grazing behaviour of the cattle, and there

333 are three different classes of biosensors that can be used to identify such movements. These  
334 include:

335 2.1. Mechanical sensors (pressure sensors), acoustic sensors (microphone) and  
336 electromyography sensors

337

338 Early systems developed to quantify the feeding behaviour of cattle were created exclusively for  
339 research purposes. The IGER Behaviour Recorder (Institute of Grassland and Environmental  
340 Research, Okehampton, UK) (Rutter et al., 1997) and the ART-MSR pressure sensor (Agroscope  
341 Reckenholz-Tänikon ART Research Institute, Modular Signal Recorder MSR145, MSR  
342 Electronics GmbH, Switzerland) (Nydegger et al., 2010) were designed specifically to be used in  
343 pastures and stables, respectively. The IGER Behaviour Recorder comprises a noseband and an  
344 electronic interface connected to a computer to record, analyse and store data at 20Hz (Rutter,  
345 2000). Jaw movement is identified as a pressure peak through the transmission of the movement  
346 to the halter and the change in the tube pressure. The installed software can distinguish between  
347 bites and chews (Rutter, 2000). Peaks are considered to be bites when they are a combination of  
348 a major long peak followed by a smaller sub-peak, or a non-symmetrical peak in the absence of  
349 the sub-peak (Nadin et al., 2012). The IGER Behaviour Recorder can also be used to estimate the  
350 feed intake with reasonable accuracy, using data on the number of chews and eating duration  
351 (using correlation coefficients) (Pahl et al., 2016). Miscalculations in the pressure sensing arise  
352 from practical considerations, i.e., due to variations in the tightening of the halter on individual  
353 animals, which can result in different pressure values. Another practical issue relates to the  
354 measurement of the output wave signal, which can be altered if the halter is mounted too tightly  
355 or too loosely. Eating and rumination behaviours in cattle have also been reported with a



356 noseband pressure sensor, consisting of a data logger, incorporated in the noseband to record the  
357 jaw movements via a pressure sensor (Braun et al., 2013).

358

## 359 2.2. Monitoring jaw movement through acoustic sensing

360 Acoustic analysis of grazing behaviour has been shown to accurately identify chewing and  
361 biting, and therefore can be used to estimate the food intake of cattle (Laca and WallisDeVries,  
362 2000). Acoustic analysis allows differentiation of three types of jaw movements: chew, bite and  
363 chew-bite, and microphones can be used to record the jaw sounds of a grazing animal (Ungar  
364 and Rutter, 2006). The data can be used to classify ruminating behaviour (Benvenuti et al.,  
365 2016; Navon et al., 2013) and are especially helpful in monitoring animal wellbeing.

366

367 Acoustic sensing of jaw movements can be classified based on the microphone location and  
368 acoustic system classification. Detailed analysis of the systems currently in use are elaborated in  
369 Figure 2. Some systems are simple and detect jaw movements based on 10-minute recordings of  
370 grazing sessions on a camera, with an accuracy of 94% (Herinaina et al., 2016; Navon et al.,  
371 2013). Signal patterns are analysed by the machine-learning algorithms to determine intervals  
372 between jaw movements, intensity of each jaw movement (observed as a peak in the time  
373 domain), their duration, and their integration in a sequence of behaviours (Navon et al., 2013).  
374 The discrimination is based on the signal patterns produced during biting and chewing in a 1-  
375 kHz sound window: peak frequency, peak intensity, average intensity and their duration (Laca et  
376 al., 2000). Clapham and colleagues have demonstrated a fully automatic Chew-Bite Real-Time  
377 Algorithm for detection and classification of ingestive events during cattle grazing. The system  
378 consists of a directional wide-frequency microphone facing inwards on the forehead of the

379 animal, and coupled with the signal analysis and decision logic algorithm, it can detect and  
 380 analyse bites and chews with an accuracy of 94% (Clapham et al., 2011). Milone *et al.* have  
 381 reported the detection and classification of bites, chews and chew-bites with the help of the  
 382 Hidden Markov model, which estimates the sequences of bites, chews and chew-bites using  
 383 acoustic spectrum characteristics like decibels, by each sound. The successful classification is  
 384 reported to range between 61% and 99% (Milone et al., 2012).

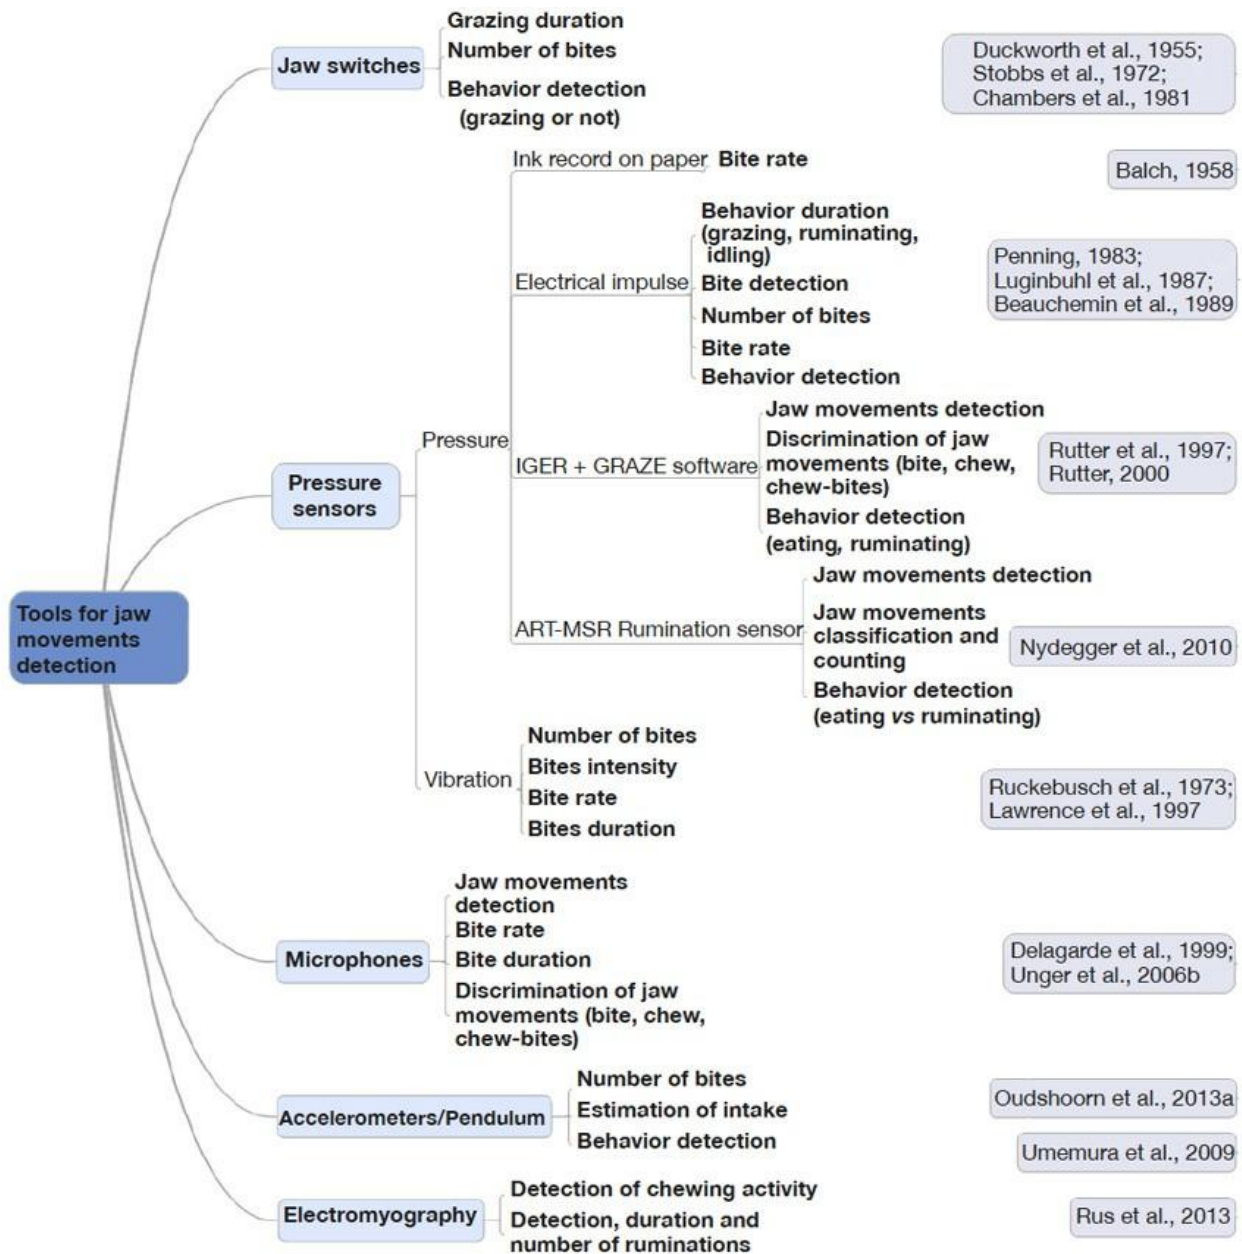

385

386

387 **Figure 2. Primary tools used to detect jaw movements in cattle. Source: (Herinaina et al.,**  
388 **2016)**

389 Microphone-based methods have demonstrated good accuracy for the detection of jaw  
390 movements and can differentiate between three different kinds of jaw movements. However, one  
391 of the key disadvantages of acoustic systems in outdoor environments is their susceptibility to  
392 environmental noises. Acoustic interpretation techniques that can overcome these disturbances  
393 still need to be advanced before these systems are deployed on the farm.

394

### 395 2.3. Acceleration sensors for jaw movement and feeding behaviour

396 Accelerometer sensors convert physical acceleration recorded from motion or gravity into a  
397 voltage output. Accelerometers can be used to measure static acceleration due to gravity, the  
398 low-frequency component of the acceleration and the dynamic acceleration due to animal  
399 movement (Herinaina et al., 2016). Several researchers have demonstrated the use of  
400 accelerometers for analysing the grazing behaviour of animals (Mattachini et al., 2016; Tani et  
401 al., 2013; Giovanetti et al., 2017). Andriamandroso *et al.* (Andriamandroso et al., 2015) used  
402 smartphone inertial measurement units (IMUs) to count the number of bites through a frequency  
403 pattern of single-axis acceleration data.

404

405 Oudshoorn *et al.* (Oudshoorn et al., 2013) were the first to use a 3-axis accelerometer to quantify  
406 cow bites. The method involved visualisation of the recorded signals from the three individual  
407 orthogonal axes to determine the signal that best matched the recorded bites. The method,  
408 however, indicated an average correlation coefficient of 0.65. Umemura *et al.* were able to

409 monitor the jaw movements by modifying a pedometer into a pendulum, attached to the lower  
410 jaw. The data from the device could be downloaded wirelessly and the system showed 90%  
411 accuracy in measuring jaw movements when compared to manual counts over 10-minute  
412 segments (Umemura et al., 2009).

413

414 One key issue associated with the use of accelerometers is the sensitivity of the signals recorded.  
415 Undesirable signals due to rapid head movement or the movement of ears can interfere with data  
416 interpretation, and the system would require a pre-processing of the signal relative to the jaw  
417 movements in order to be useful for precision livestock farming. Interestingly, the IMUs, which  
418 combine several sensors such as the accelerometers, gyroscope, magnetometer and GPS, can  
419 offer a real advantage in terms of multiple-parameter measurements related to animal feeding  
420 behaviour and animal position (active or not). Figure 3 details the key components of multi-  
421 parametric sensors deployed for precision livestock farming. These multi-parameter sensors  
422 collect and integrate the data from individual sensors to provide a comprehensive health picture  
423 of individual animals, as well as herd behaviour. Such integrated sensors will also enable  
424 predictions on animal health events and disease. In the event of a disease outbreak, multi-  
425 parameter sensors can assist in identification and isolation of affected livestock before the spread  
426 of the outbreak and potentially prevent unnecessary culling of uninfected animals, as is the  
427 current practice in animal husbandry.

428

429

430

431

432  
433  
434  
435  
436  
437  
438  
439  
440  
441  
442  
443  
444  
445

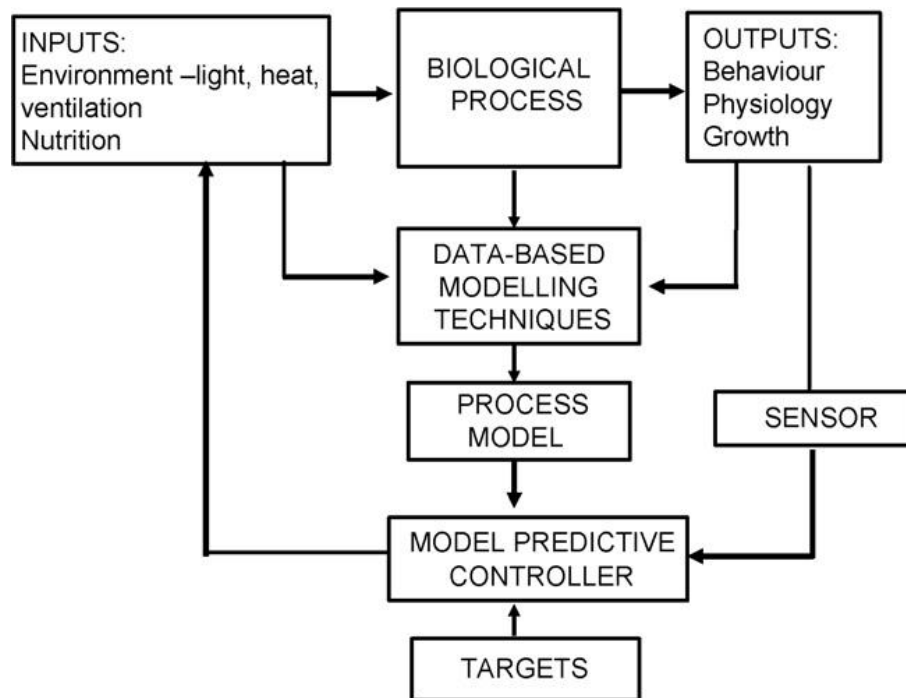

446 **Figure 3.** Schematic overview of the key components of Precision Livestock Farming to  
447 control biological processes. Source: (Wathes et al., 2008) Reprinted with permission from  
448 Elsevier Ltd.

449

### 450 **3. Biosensors for breath analysis**

451 Disease diagnosis by identification of volatile organic compounds (VOCs) has long been of  
452 interest to researchers, as it offers a non-invasive methodology. VOCs can be found in the breath,  
453 blood, faeces, skin, urine and vaginal fluids of animals as well as humans (Burciaga-Robles et  
454 al., 2009; Garner et al., 2009; Spinhirne et al., 2004). These compounds are produced by a

455 number of biochemical reactions, pathogens, and host pathogen interactions and are affected by a  
456 number of biological variables such as age, actions, and biochemical pathways (Sethi et al.,  
457 2013). Breath monitoring provides a non-invasive and easy approach to determine the  
458 physiological and general health status of animals. Advances in sampling methods, like solid-  
459 phase and needle trap micro-extraction, and developments in techniques for representative breath  
460 sampling (Turner et al., 2012) can be coupled with modern analytical technologies (spectroscopy  
461 techniques and electronic noses) to allow for precise analysis of breath composition at an  
462 unprecedented level (Pereira et al., 2015b). One of the key challenges that require important  
463 attention is the statistical analysis and data interpretation of large and potentially heterogeneous  
464 datasets collected from research on the exhaled breath composition from animals.

465

466 Metabolites in the breath include gasses like hydrogen and methane and volatile organic  
467 compounds such as fatty acids, which can act as biomarkers for metabolic and pathologic  
468 processes. Usually, the glucose level in blood is associated with VOCs like ketone bodies,  
469 ethanol, methanol and exogenous compounds (Leopold et al., 2014).

470

471 In cattle, analysis of VOCs has been explored to diagnose bovine respiratory disease (Burciaga-  
472 Robles et al., 2009), brucellosis (Knobloch et al., 2009), bovine tuberculosis (Fend et al., 2005;  
473 Peled et al., 2012), Johne's disease (Kumanan et al., 2009), ketoacidosis (Mottram et al., 1999),  
474 and normal rumen physiology. A rapid, non-invasive identification of foot-and-mouth disease  
475 has been performed using air samples collected with a hand-held prototype device equipped with  
476 electrostatic particle capture in a microchip chamber of 10-15  $\mu$ L (Christensen et al., 2011).

477

#### 478 **4. Sensors analysing metabolites in perspiration**

479

480 Most biosensors developed for analysing metabolites in sweat were developed with the purpose  
481 of human health monitoring. These have been used to analyse sodium concentration (Schazmann  
482 et al., 2010) and lactate levels, and converted to portable formats (belt form) to analyse sweat.  
483 The electrochemical sensor for lactate levels includes a flexible printed tattoo that can detect  
484 lactate levels with linearity up to 20 mM. The sensor has been shown to be resilient against  
485 mechanical deformation. This sensor can also be adapted for use in animal sweat monitoring,  
486 especially as a sign of physical stress in animals (Jia et al., 2013). Others have developed an  
487 adhesive radio-frequency identification (RFID) sensor patch, which allows for potentiometric  
488 sensing of solutes and surface temperature that can be read on a smartphone application (Rose et  
489 al., 2015). New research in this area has led to the development of a fully integrated wearable  
490 sensor array for multiplexed analysis of perspiration. The system includes a mechanically  
491 flexible sensor array that measures metabolites like glucose and lactate, and electrolyte  
492 composition such as sodium and potassium ions. The sensor also integrates temperature  
493 measurement for comprehensive analysis (Gao et al., 2016).

494

495 Bovine tuberculosis (*M. bovis*) is a chronic bacterial disease affecting cattle and can occasionally  
496 spread to humans by the inhalation of aerosols or consumption of unpasteurised milk. The ability  
497 to identify volatile organic compounds produced by pathogens has been applied to this  
498 technology for the detection of *M. bovis* infection by analysing the changes in the volatile  
499 organic compound profiles present in breath. More recently, a proof of concept has been

500 presented to reveal that the breath-derived volatile organic compound analysis can be used to  
501 differentiate between healthy and *M. bovis*-infected cattle (Ellis et al., 2014).

502

503 The TB Breathalyser system for tuberculosis diagnosis in humans, developed by Rapid  
504 Biosensor Systems, is already available in the market (McNerney et al., 2010). The gas-  
505 chromatography/mass-spectrometry analysis has revealed the presence of VOCs associated with  
506 *M. bovis* infection. A nanotechnology-based array of sensors has been tailored for detection of  
507 *M. bovis*-infected cattle via breath, which allows real-time cattle monitoring (Peled et al., 2012).  
508 Kumanan *et al.* have reported the development of a membrane-strip-based lateral-flow biosensor  
509 combined with a high-throughput microtiter plate assay to enable highly sensitive reverse  
510 transcriptase polymerase chain reaction (RT-PCR) -based detection of viable *Mycobacterium*  
511 (*M.*) *avium* subsp. paratuberculosis cells in faecal samples (Kumanan et al., 2009).

512

## 513 **5. Analysis of tears for continuous glucose monitoring**

514

515 Metabolites in tears can provide information about the concentration of these metabolites in  
516 blood and provide a non-invasive continuous monitoring technique. Iguchi *et al.* have reported  
517 the development of a flexible, wearable amperometric glucose sensor using immobilised glucose  
518 oxidase on a flexible oxygen electrode (Pt working electrode and Ag/AgCl counter/reference  
519 electrode). The biosensor is fabricated using Soft-MEMS techniques onto a functional polymer  
520 membrane (Iguchi et al., 2007). Others are working towards the development of a biosensor for  
521 self-monitoring of tear glucose and are currently in the animal testing stages (La Belle et al.,  
522 2014) (Yonemori et al., 2009).



523

524 **6. *In vivo* implanted biosensor to analyse stress in fish**

525

526 Fish health is affected by multiple environmental parameters as well as conditions in the fish  
527 farms. Stressors include water pollution and changes in climate. Farm management practices like  
528 stocking density and water exchange can also induce fish stress (Figure 4). Wu *et al.* have  
529 devised an implantable biosensor that detects the composition of eyeball scleral interstitial fluid  
530 in fish. The contents of the fluid correlate well with their concentrations in blood. Stress due to  
531 changes in water chemistry, dissolved oxygen content, pH, and metal toxicity were monitored,  
532 and behavioural changes such as attacking behaviour and visual irritation were recorded (Wu et  
533 al., 2015). Hibi *et al.* have developed a wireless biosensor system for continuous monitoring of  
534 stress biomarker L-lactic acid in fish using the eyeball interstitial sclera fluid site for sensor  
535 implantation. The biosensor allows for wireless monitoring of L-lactic acid in free-swimming  
536 fish (Hibi et al., 2012).

537

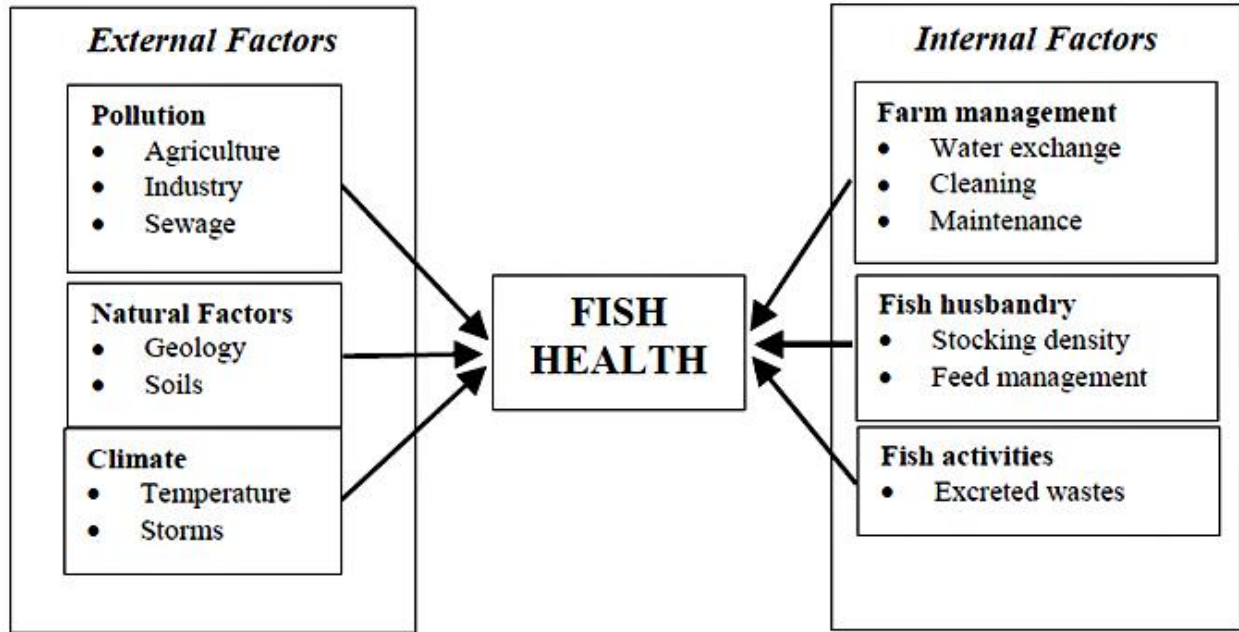

538

539 **Figure 4. Environmental and farm management practices affecting fish health.**

540

Source: (Ingram et al., 2005)

541

542

## 543 **7. Detection of ovulation**

### 544 **7.1. Progesterone**

545

546 Breeding forms an integral part of livestock farming. Detection of the ovulation period in cattle

547 is important in order to determine the time window for artificial insemination. Conventional

548 oestrus detection involves ocular inspection of cattle by skilled labour, which is expensive as

549 well as inefficient. Biosensors for ovulation detection have been researched for a long time.

550 Pemberton and colleagues reported a device able to determine ovulation using a disposable

551 screen-printed amperometric progesterone biosensor, operated in a competitive immunoassay.

552 The biosensor included a monoclonal anti-progesterone antibody (mAb) immobilised on a

553 screen-printed carbon electrode (SPCE). It was later incorporated into a thin-layer flow cell  
554 offering advantages such as on-line analysis and improved fluid handling with the possibility of  
555 future automation (Pemberton et al., 2001). The Herd Navigation® system was developed in  
556 2008 for commercial use and combines five sensing systems, including progesterone in the milk.  
557 Herd Navigator™ (Durkin and DeLaval, 2010) measures the level of progesterone in milk and  
558 the software suggests the insemination time, lists animals for final pregnancy confirmation,  
559 indicates early abortion and lists the cows at risk for cysts and prolonged anoestrus (Mazeris,  
560 2010). Oestrus detection rates of 95-97% have been reported in the farms in Denmark, with  
561 significantly higher pregnancy rates (up to 42-50%) than the conventional techniques (Blom and  
562 Ridder, 2010; Vreeburg, 2010b). There are also reports indicating cost savings of €250 and  
563 €350/cow per year, as farmers do not have to spend money on expensive pregnancy tests  
564 (Mazeris, 2010; Leonardi et al., 2013).

565

## 566 7.2. SPR-based biosensors for progesterone

567

568 More recently, Zeidan and colleagues have reported the development of a progesterone sensor by  
569 integrating novel aptamer development with a nanoEnhanced Surface Plasmon Resonance  
570 imaging sensor (SPRi). The authors first developed X-aptamers and selected them for binding to  
571 progesterone. Then, the multi-array feature of SPRi was used to develop an optimised biosensor  
572 capable of simultaneously screening the 9 X-aptamers for binding affinities. The sensor surface  
573 was further optimised in a sandwich assay, where nanoEnhancers (NIR-streptavidin-coated  
574 quantum dots) were used for ultrasensitive detection of progesterone molecules (Zeidan et al.,  
575 2016).

### 576 7.3. Herd Navigator™ for monitoring ovulation

577 Herd Navigator has excellent oestrus detection rates, but the system is too expensive. Aiming at  
578 improving detection reliability using low-cost sensor data, Jónsson *et al.* reported the  
579 combination of information from step count and leg tilt sensors. The authors developed a  
580 change-detection algorithm that can analyse cow-specific data in real time. The system has  
581 shown an increase in the successful alerts and significantly reduced false positives (Jónsson *et*  
582 *al.*, 2011).

583

### 584 7.4. Intravaginal probes

585 Andersson *et al.* tested a wireless intravaginal probe, with a possibility for automation of the  
586 process. The probe is based on the measurements of conductivity and temperature, and also  
587 senses the movement of the animal. These parameters can all be used independently to detect  
588 oestrus. Although still in the testing phase, the device has been shown to have a higher reliability  
589 and to be more resistant to external disturbances as compared to existing alternatives (Andersson  
590 *et al.*, 2016; Andersson *et al.*, 2015).

591

## 592 8. Biosensors for animal diseases

### 593 8.1. Bovine Respiratory Disease

594 Bovine Herpes Virus-1 (BHV-1) is a major viral pathogen of Bovine Respiratory Disease  
595 (BRD), the prominent cause of economic loss (\$2 billion annually in the US alone) to the cattle  
596 and dairy industries. Tarasov *et al.* report the development of an extended-gate field-effect  
597 transistor (FET) for direct potentiometric serological diagnosis of the BHV-1 viral protein via an  
598 IgE-coated immunosensor. The biosensor was presented to be sensitive and selective to anti-IgE

599 present in commercially available anti-BHV-1 antiserum and in real serum samples from cattle.  
600 The system was shown to be faster than the traditionally used ELISA, amenable to multiplexing,  
601 and easily integrated into POC devices (Tarasov et al., 2016).

602  
603 Schaefer and colleagues have investigated the use of an automated, RFID-driven, infrared  
604 thermography technology to determine BRD in cattle. The animals were monitored for BRD  
605 using biometric clinical scores, body temperature, haematology, serum cortisol and infrared  
606 thermal values. The data collected showed a correlation between animals positive for BRD with  
607 higher peak infrared thermal values of  $35.7 \pm 0.35$  °C, in comparison to the true negative  
608 animals'  $34.9 \pm 0.22$  °C. The study is a proof of concept that the thermography data could be  
609 non-invasively and automatically collected on the basis of a system developed around the  
610 animals' water station (Schaefer et al., 2012).

611

## 612 8.2. Detection of Bovine viral diarrhoea virus (BVDV)

613 While ELISA and PCR-based methods have long been used for the detection of BVDV (Da  
614 Silva et al., 1995; Pritchard et al., 2002), rapid detection of BVDV requires an on-site monitoring  
615 and detection system to expedite the diagnosis and minimise the spread of disease in the herd.  
616 BVD disease affects beef and dairy industries worldwide, with severe implications to costs.  
617 Rapid diagnosis of BVDV through on-farm analysis is critical for herd protection and prevention  
618 of herd outbreaks. To this end, Montrose *et al.* have developed a fully integrated nanowire-based  
619 immunosensor to detect BVDV in serum. The biosensor has BVD virus as a capture molecule,  
620 which is covalently immobilised to a polymer electrodeposited onto a nanowire (Montrose et al.  
621 2015). Luo *et al.* have developed an electrospun biosensor based on capillary separation and

622 conductometric immunoassay for the detection of BVDV antibodies. The detection time of the  
623 biosensor is 8 minutes, and the detection limit is  $10^3$  CCID/mL for BVDV viral samples (Luo et  
624 al., 2010). Heinze *et al.* have utilised microparticle immunoagglutination assays on a  
625 microfluidic chip using forward light scattering measurements to detect BVDV particles (Heinze  
626 et al., 2009).

627

### 628 8.3. Avian influenza virus

629 Avian Influenza Virus (AIV) infections have been a major cause of mortality, and rapid  
630 detection methods for avian influenza have huge clinical, economical and epidemiological  
631 implications. Diagnosis with ELISA and PCR is generally time-consuming and expensive,  
632 requiring transport of samples to specialised laboratories. In recent years, there have been several  
633 developments to miniaturise as well as provide assays that can be used on the farms for diagnosis  
634 of disease. Diouani *et al.* and Wang *et al.* have reported the development of a miniaturised gold  
635 electrode biosensor using impedance spectroscopy to detect H<sub>7</sub>N<sub>1</sub>. The biosensor is based on the  
636 detection of immobilised H<sub>7</sub>N<sub>1</sub> antibodies onto a bio-functionalised gold electrode (Diouani et  
637 al., 2008) (Wang et al., 2009).

638

639 Xu *et al.* have developed an interferometric biosensor immunoassay for the direct and label-free  
640 detection of avian influenza strains H<sub>7</sub> (two strains) and H<sub>8</sub> (one strain) through whole virus  
641 capture on a planar optical waveguide. The assay relies on the index of refractive changes  
642 occurring upon binding of virus particles to unique antigen-specific (hemagglutinin) antibodies  
643 on the waveguide surface (Xu et al., 2007). Others have developed DNA-aptamers as recognition  
644 elements in portable Surface Plasmon Resonance (SPR) -based biosensors for rapid detection of

645 H<sub>5</sub>N<sub>1</sub> in swab samples from poultry (Bai et al., 2012). Luminescence resonance energy transfer  
646 (LRET) -based biosensors for the ultrasensitive detection of the H<sub>7</sub> strain (Ye et al., 2014) and  
647 indium-tin-oxide thin-film transistors (ITO TFTs) on a glass substrate for immune detection of  
648 H<sub>5</sub>N<sub>1</sub> antibodies have also been reported (Guo et al., 2013).

649  
650 Others have developed quartz crystal microbalance (QCM) aptasensors based on ssDNA  
651 crosslinked polymeric hydrogel for rapid, sensitive and specific detection of H<sub>5</sub>N<sub>1</sub> within 30  
652 minutes (Wang and Li, 2013) and QCM-based immunosensors to detect H<sub>5</sub>N<sub>1</sub> (Li et al., 2011).  
653 Impedance-based sensitive and rapid methods for screening for the H<sub>5</sub> subtype using immune-  
654 magnetic nanoparticles have been reported, in which the virus is separated and the measurement  
655 of an interdigitated microelectrode utilised for impedance measurement (Lum et al., 2012).

656

#### 657 8.4. Foot-and-mouth disease

658 Rapid initial diagnosis of foot-and-mouth disease virus (FMDV) is essential for faster diagnosis.  
659 Several biosensors have been developed recently to provide portable systems for the diagnosis of  
660 FMDV. These have been reviewed extensively by Niedbalski (Niedbalski, 2016). The systems  
661 developed include lateral flow immunochromatographic (LFI) for the detection of antibodies  
662 against FMDV proteins (Yang et al., 2015; Yang et al., 2013) to detect FMDV serotypes O, A,  
663 Asia 1, SAT 2 and non-serotype-specific FMDV. Several FMD-specific real-time RT-PCR (rRT-  
664 PCR) assays have been made into portable mobile platforms for in-field detection of FMDV.  
665 These include the Cepheid Smart Cycler Real-time PCR machine (Hearps et al., 2002), and the  
666 BioSeq-Vet (Smiths Detection). Genie I, a portable platform, also allows for the on-site  
667 detection of viral RNA by reverse-transcription loop-mediated isothermal amplification (RT-

668 LAMP) (Waters et al., 2014). Recently, rapid identification of FMDV has been reported using  
669 SpectroSens<sup>TM</sup> optical microchip sensors. Selective identification of FMDV is conducted in  
670 minutes and displayed as a yes/no readout using a hand-held device (Bhatta et al., 2012). Infrared  
671 thermography (IRT), a quantitative method for the assessment of body surface temperature, can  
672 be useful for the early detection of FMDV in the field. Temperature screening can be used to  
673 isolate potentially sick animals at an early stage and prevent the spread of disease. Microarrays,  
674 designed for laboratory diagnosis of FMD, offer greater screening capabilities for FMDV  
675 detection and can be regarded as an alternative to classical diagnostic methods. However, the  
676 apparatus needs to be miniaturised and made portable before it can be used directly in the field.  
677

#### 678 8.5. Automated Detection of Mastitis

679 Mastitis is associated with the inflammation of the udder in cattle due to an infection by  
680 *Staphylococcus aureus*. Mastitis detection in milk is based on two milk quality aspects: the  
681 somatic cell count (SCC) and the presence of visibly abnormal milk in the case of clinical  
682 mastitis. Efficient detection of mastitis is essential in order to manage the infected cattle and  
683 progression to clinical mastitis (Hogeveen et al., 2010). Neitzel and colleagues have developed  
684 an indirect on-line sensor system based on the automated California Mastitis Test (CMT) in milk  
685 (Neitzel et al., 2014). Duarte *et al.* have reported the development of an immune assay based on  
686 coupling with magnetic nanoparticles, which is analysed using a lab-on-a-chip magneto resistive  
687 cytometer, with microfluidic sample handling (Duarte et al., 2016). Others have reported the  
688 development of selective amperometric biosensors for infected milk detection based on the  
689 quantification of the catalase enzyme, which is immobilised on a thin-layer enzyme cell (Fútó et  
690 al., 2012).



691

## 692 8.6. Subclinical ketosis

693 Nanobiosensors can significantly aid in the real-time detection of beta-hydroxy butyrate from  
694 blood or milk to assess the energy balance of the animals.  $\beta$ -hydroxybutyrate ( $\beta$ HBA) is an  
695 indicator of subclinical ketosis, a common disease in dairy cows. Subclinical ketosis is one of the  
696 metabolic diseases associated with negative energy balance during the transition period, as well  
697 as decreased milk yields, impaired reproductive performance and higher risk of clinical ketosis,  
698 resulting in economic losses (Ospina et al., 2010). Weng and colleagues have recently reported  
699 the development of the on-chip detection of  $\beta$ HBA using a miniaturised, cost-effective optical  
700 sensor. The authors report that the analysis can be completed in 1 minute and has a detection  
701 limit of 0.05 mM  $\beta$ HBA (Weng et al., 2015b). In another study, a biosensor using quantum dots  
702 (QDs) modified with cofactor nicotinamide adenine dinucleotide (NAD<sup>+</sup>) has been used for  
703 sensing  $\beta$ HBA concentration in a cow's blood and milk sample. The detection is performed on a  
704 custom-designed microfluidic platform combined with a low-cost, miniaturised optical sensor.  
705 The sensing platform has a detection limit better than the previous method at 35  $\mu$ M (Weng et  
706 al., 2015a) (Neethirajan et al., 2016).

707

## 708 8.7. Detection of porcine reproductive and respiratory syndrome (PRRS) virus

709 Infection with the porcine reproductive and respiratory syndrome virus (PRRSV) results in  
710 PRRS in pigs, also known as the blue-ear pig disease, causing reproductive failure in breeding  
711 stock accompanied by respiratory tract illness in piglets. The disease costs the United States  
712 swine industry around \$644 million annually according to a 2011 study (Holtkamp et al., 2013),  
713 and recent estimates in Europe found that it cost almost 1.5b€ in the year 2013. Several

714 immunodetection-based biosensors have been reported for the detection of PRRS and are  
715 detailed in Table 1.

716

717 *Table 1. Techniques used for the detection of porcine reproductive and respiratory syndrome*

718 *virus*

| Methodology                                                                                                      | Detection limit for<br>PRRS virus                                                                       | Reference               |
|------------------------------------------------------------------------------------------------------------------|---------------------------------------------------------------------------------------------------------|-------------------------|
| Near-infrared electrochemi-luminescence biosensor                                                                | 380 pg/ml                                                                                               | (Shao et al., 2017)     |
| Platinum nanotube-based fluorescent immuno-assay                                                                 | 2.4 ng/mL                                                                                               | (Chen et al., 2015a)    |
| enzyme-linked aptamer-antibody sandwich (ELAAS)                                                                  | 4.8 TCID <sub>50</sub> /ml                                                                              | (Lee et al., 2013)      |
| Immuno capture followed by imaging epsillometry                                                                  | 2.4×10 <sup>3</sup> median cell infectious dose (CCID <sub>50</sub> mL <sup>-1</sup> ) infectious virus | (Chen et al., 2013)     |
| Fluorescence Resonance Energy Transfer (FRET) -based optical biosensor using gold nanoparticles and quantum dots | 3 viral particles/μl                                                                                    | (Stringer et al., 2008) |

---

Fluorescence resonance energy

transfer (FRET) -based using gold <25 particles/ml (Grant et al., 2006)

nanoparticles

Piezoelectric quartz crystal-based

(Su et al., 2000)

frequency changes

---

719

## 720 8.8. Salivary detection of metabolites of clinical significance

721 Saliva sampling for disease and other biochemical markers of physiological health is an  
722 attractive alternative to blood sampling, as it is non-invasive in nature (Bandodkar and Wang,  
723 2014). The method is particularly useful for animal monitoring and disease diagnostics, as blood  
724 collection from animals is considered to be a stress inducer and may have an impact on the  
725 biochemical parameters being diagnosed. The ability to collect and immediately analyse the  
726 salivary samples on-site provides numerous advantages for field applications. Biomarkers in  
727 saliva can be helpful in numerous ways, e.g.: (i) early detection and diagnosis of diseases; (ii) in  
728 supporting the decision-making processes for animal handling; and (iii) to monitor the  
729 progression of disease (Malon et al., 2014). However, it must be noted that current analysis  
730 procedures, if applied to saliva, would require huge amounts of salivary probes for the  
731 biochemical assays. Although saliva sampling using oral fluid collectors and commercial devices  
732 (Mottram et al., 2004) is generally safe and convenient to use and provides a sufficient  
733 homogeneous sample with low viscosity, it still presents several shortcomings, such as (i) the  
734 requirement of supervision; (ii) the need to follow the procedures carefully to ensure sample  
735 adequacy; and (iii) it is a time-consuming process. Moreover, the assays for biomarkers in saliva

736 have to be calibrated against the assays for blood samples to ensure the sensitivity of detection  
737 and the robustness of the assays.

#### 738 *8.8.1. Biosensors for salivary uric acid*

739 An abnormal concentration of uric acid acts as a biomarker for several diseases, such as  
740 metabolic syndrome, renal syndrome, and abnormalities in purine metabolism (Nakagawa et al.,  
741 2006; Nyhan, 1997). Uric acid is also known to be present in response to physical stress  
742 (Hellsten et al., 1997). Detection of uric acid in saliva presents a non-invasive method, and there  
743 is a good correlation between uric acid levels in blood and saliva (Soukup et al., 2012). Kim *et*  
744 *al.* have reported the development of a wearable salivary uric acid mouth guard sensor in which a  
745 uricase-modified screen-printed electrode system is integrated into a mouth guard platform. It  
746 uses miniaturised instrumentation electronics featuring a potentiostat, a microcontroller, and a  
747 Bluetooth Low Energy (BLE) transceiver. This platform enables real-time wireless transmission  
748 of information to standard smartphones and other storage devices (Kim et al., 2015).

749

#### 750 *8.8.2. Measurement of salivary cortisol as an animal stress biomarker*

751 Measurement of corticosteroid hormones is commonly used as a biomarker of an animal's  
752 response to stress. The difficulties in obtaining blood samples and the recognition of the stressor  
753 effect of blood sampling are primary drivers for the use of minimally invasive sample media.  
754 Salivary cortisol has been established as a viable indicator of stress levels in animals held in  
755 captive environments. The suitability of a cortisol assay and its validation have been detailed in  
756 the review by Cook (Cook, 2012). More recently, Yamaguchi *et al.* have demonstrated the  
757 development of a cortisol immunosensor for the non-invasive and quantitative analysis of  
758 salivary cortisol. The immunosensor detects current resulting from a competitive reaction

759 between the sample cortisol and a glucose oxidase (GOD)-labelled cortisol conjugate, and  
760 quantifies cortisol levels based on a calibration curve. The technique takes 35 minutes for  
761 analysing salivary cortisol levels and the device can be used on-site. The method was also shown  
762 to closely correspond to the currently available ELISA method (Yamaguchi et al., 2013).

763

### 764 8.8.3. *Measurement of salivary glucose*

765 Salivary glucose biosensors have primarily been developed for human use and for domestic pets  
766 (Reusch et al., 2006; Stein and Greco, 2002), but they have vast potential in monitoring livestock  
767 health. Most of the sensors developed for humans have also been tested in animals. The sensors  
768 are lightweight and portable and can be used directly on-field (Park et al., 2009).

769

### 770 8.9. *In vivo* real-time sensing for uric acid in poultry

771 Energy pathways in birds are lipid metabolism rather than the glucose metabolism dominant in  
772 other animals, and uric acid levels are indicative of protein catabolism in birds (Gumus et al.,  
773 2014). Numerous methods for uric acid detection based on chemiluminescence,  
774 spectrophotometry, fluorescence (Martinez-Pérez et al., 2003) and electrochemistry (Jindal et al.,  
775 2012) have been developed. However, Gumus *et al.* have reported the development of uric acid  
776 sensing based on uricase enzyme for *in vivo* applications. It is an enzyme-based method using  
777 Pt/Ir wire and Ag/AgCl paste. The sensor has a linear response for uric acid in the range of 0.05  
778 to 0.6 mM uric acid, which covers the physiological levels for avian species and is able to  
779 transmit the data wirelessly.

780

781 8.10. Salivary alpha amylase as a stress biomarker in pigs

782 While cortisol is an essential hormone responsible for the regulation of stress, salivary alpha-  
783 amylase is a novel biomarker for psycho-social stress. This has been validated by Fuentes *et al.*  
784 using an automated spectrophotometric method for salivary alpha-amylase measurement  
785 (Fuentes et al., 2011). Wu *et al.* have fabricated an inexpensive, disposable  $\alpha$ -amylase biosensor  
786 by immobilising a layer of starch gel on a thick-film magnetoelastic sensor. When exposed to  $\alpha$ -  
787 amylase, the resonance frequency of the starch gel-immobilised sensor increases in proportion to  
788 the starch hydrolysis by  $\alpha$ -amylase, allowing for its quantification. The sensor described can  
789 detect 75 to 125 U/ml  $\alpha$ -amylase (Wu et al., 2007).

790

791 9. Livestock monitoring systems for observing physiological parameters and health of cattle

792 Jegadeesan *et al.* have proposed a two-component system. The first component is the monitoring  
793 and collection of data on the health parameters of animals in the field, and the second component  
794 is the monitoring and acquisition of data on animals from the farms. Animals are subjected to a  
795 variety of stress factors during their lives on farms. These include stressors due to changes in  
796 temperature, transport across farms, physiological stress due to ill health or improper food intake  
797 as well as stress due to restraint (detailed in Figure 5). This information on the external  
798 environment and animal health can be collected and analysed in real time using closed-circuit  
799 cameras. The complete system is expected to work independently, making necessary changes in  
800 response to the real-time data inputs. Human intervention is only expected in the event of an  
801 emergency (Jegadeesan and Venkatesan, 2016). Although such a model system is expected to be  
802 a norm in the near future, steps are underway to implement these integrated systems at least  
803 partly in livestock and agriculture.

804

805 Contagious livestock diseases can result in economic losses and decreased productivity for cattle

806 farms. Park *et al.* have developed a livestock monitoring system (LMS) integrated with a

807 wireless sensor network to collect data on heart rate, breathing rate and cattle movement. The

808 authors report an average correlation coefficient of 0.97 for the collected data. Such systems

809 have the ability to change the landscape of animal farming by providing comprehensive

810 information on animal wellbeing. These systems are also able to rapidly identify livestock

811 diseases and prevent economic losses stemming from loss of productivity (Park and Ha, 2015).

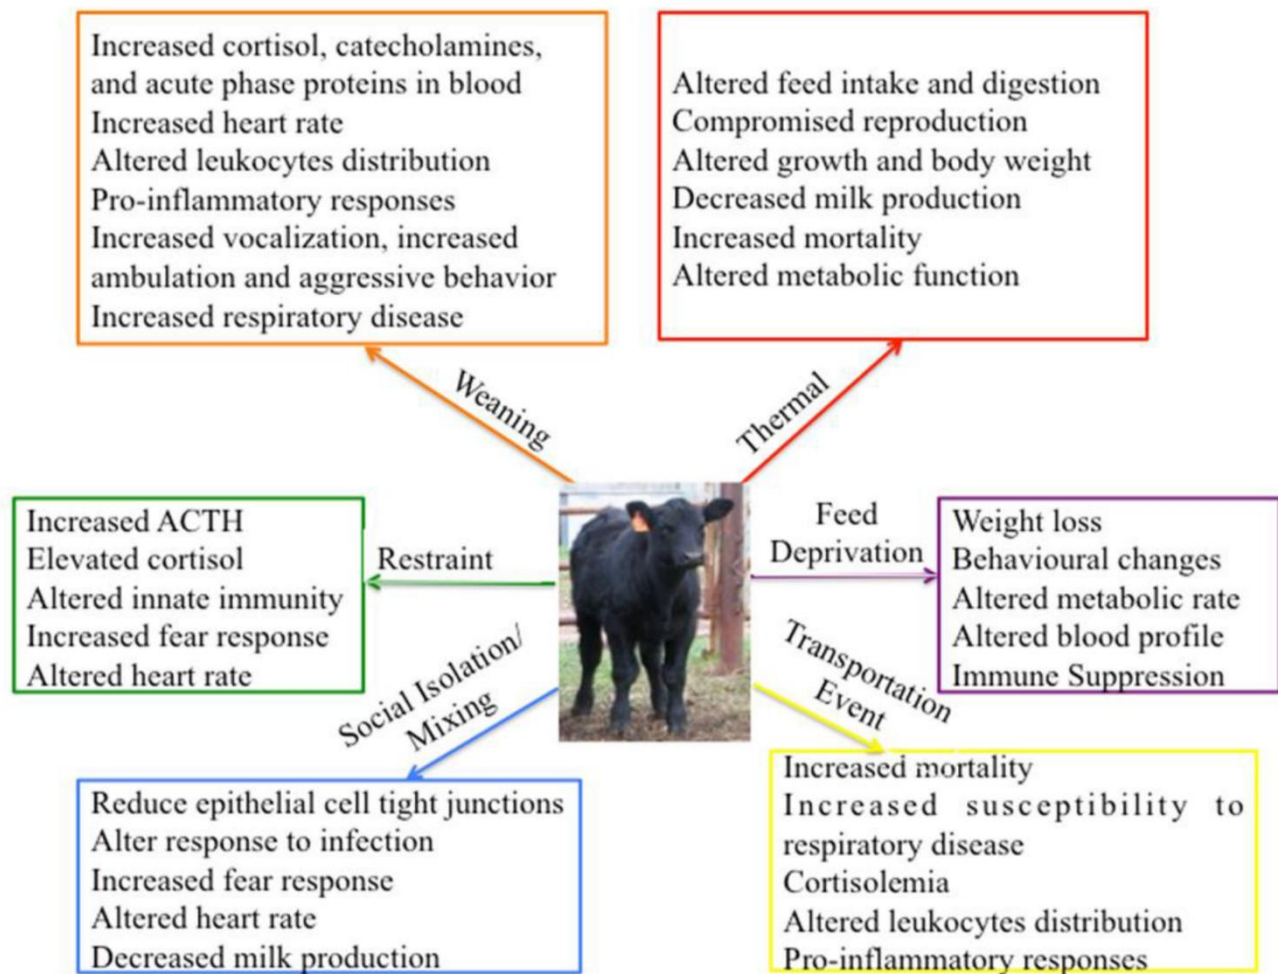

812

813

814 **Figure 5.** Impact of individual stressors on biological functions in cattle. Source: (Chen et al.,  
815 2015b)

816

### 817 9.1. Monitoring CO<sub>2</sub> ventilation in farms

818 Carbon dioxide (CO<sub>2</sub>) can be used as a tracer gas to measure ventilation, as well as emission  
819 rates of CO<sub>2</sub> (Persily, 2016). Currently, CO<sub>2</sub> concentrations from agricultural facilities are  
820 measured using a Photo Acoustic Spectroscopy (PAS) gas analyser (Chepete et al., 2012;  
821 Hassouna et al., 2013; Wheeler et al., 2006; Zhao et al., 2012) and the Open-Path laser (OP-  
822 laser) (Frish, 2014; He et al., 2009). Although these are appropriate for use in mechanically  
823 ventilated farms, the measurements in naturally ventilated farms show considerable variability.  
824 Moreover, these systems are cost-intensive when multiple samples are required. Non-Dispersive  
825 Infra-Red (NDIR) -based sensors are suggested as an alternative for PAS and OP-laser to  
826 measure CO<sub>2</sub> concentrations in NV buildings. Experimental evaluation of NDIR sensors to  
827 measure CO<sub>2</sub> levels has been demonstrated (Calvet et al., 2014; Piccot et al., 1994; Yasuda et al.,  
828 2012) along with the miniaturisation of the method, facilitating in-field usage (Hodgkinson et al.,  
829 2013). Mendes *et al.* have recently demonstrated the use of NDIR CO<sub>2</sub> sensors for monitoring  
830 CO<sub>2</sub> levels in a naturally ventilated dairy cow barn, comparing them to other commercially  
831 available NDIR CO<sub>2</sub> sensors. The authors conclude that the CO<sub>2</sub> concentrations were in  
832 agreement with the platforms tested, and the number of NDIR sensors required to represent the  
833 overall CO<sub>2</sub> concentration of the dairy cow barn must be calculated based on the barn length and  
834 occupied barn area. The NDIR CO<sub>2</sub> sensors were found suitable to be used as a multi-point  
835 monitoring system of CO<sub>2</sub> concentrations in NV buildings as a feasible alternative to PAS and  
836 the OP-laser methods (Mendes et al., 2015).



837

## 838 9.2. Monitoring animal movement and behaviour

839 Monitoring movement and behaviour can provide information on an animal's activity and  
840 wellbeing. A top-view camera can provide vital information if the animal is low-weight. Motion-  
841 detection technology and video recording coupled with the Gaussian Mixture Model (GMM) can  
842 be used to gather information on animal size and identify low-weight animals (Sa et al., 2015).  
843 MooMonitor integrates information on cow oestrus, as well as data on rumination, feeding and  
844 levels of activity. It makes use of wireless sensors for the two-way transmission of data. Other  
845 technologies, such as HerdNavigator™ and the Afimilk Silent Herdsman also serve the same  
846 purpose. The Silent Herdsman is a wearable technology and monitors all activities of cattle to  
847 analyse their behaviour. Any changes in an animal's behaviour pattern can be used to identify the  
848 oestrus cycles and onset of disease/sickness.

849

850 Honeybees produce a variety of different sounds as a means to communicate with the colony.  
851 The sounds have characteristic low fundamental frequencies between 300 and 600 Hz (Barth et  
852 al., 2005). Honeybees' sounds have specific frequencies within this range for a number of  
853 reasons. Both the range of sound frequency and the acoustic signal pattern determine the  
854 meaning of the sound. An accurate quantification of these signal patterns can give valuable  
855 information on the hive health (Qandour et al., 2014). Electronic systems for management of  
856 beehives have been developed lately and combine hive acoustics monitoring with measurement  
857 of parameters like brood temperature (Kridi et al., 2016), humidity, hive weight and the weather  
858 conditions of the apiary. Dietlein *et al.* have developed a system for automated continuous  
859 recording of sound emission by honeybees as a measure of their activity (Dietlein, 1985). The

860 specific sounds from the hives are useful in providing information on colony behaviour, strength  
861 and health, and the data from the monitoring device can be accessed remotely from any internet-  
862 enabled device (Bromenshenk et al., 2015; Evans, 2015; Meikle and Holst, 2015). Other systems  
863 are being developed that integrate visual, acoustic and beehive monitoring systems and share  
864 them with the environmental monitoring platform (Figure 6). These systems can help in  
865 collecting and analysing the data on bee behaviour for biologists (Chiron et al., 2013).  
866

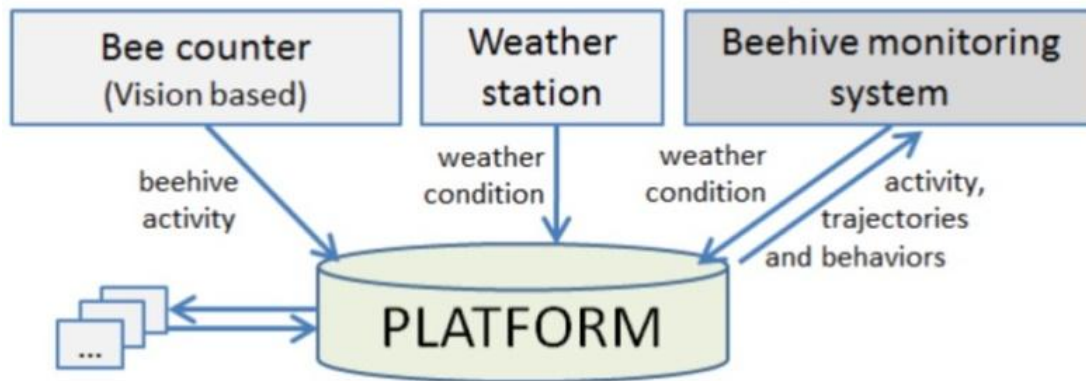

867  
868 **Figure 6. Platform for gathering information from different blocks on bee activity, bee**  
869 **trajectories and weather. The platform also allows for sharing of information with the**  
870 **beehive monitoring system. Source: (Chiron et al., 2013).**

871  
872 9.3. Bioacoustic monitoring of poultry using biosensors

873  
874 Livestock farming and production do not simply target economic goals, but food quality, safety,  
875 broiler production efficiency and sustainability (Berckmans, 2006). For these purposes, a  
876 growing need emerges in livestock farming, particularly in chicken farming, to monitor and  
877 assess the animals' health, activity and welfare in real time, efficiently and economically.

878 Current, traditional monitoring systems in poultry farming are based on manual methods or  
879 simple systems relying on the observation, judgment and experience of the farmers, which is  
880 time-consuming, not real-time, and inaccurate.

881

882 Secondly, when it comes to the monitoring of the health, activity and welfare of chickens,  
883 currently available methods and systems cannot meet the increasing technical, administrative,  
884 and organisational requirements of ever-growing farms, which limits the possibility and  
885 feasibility of monitoring their livestock (Halachmi and Guarino, 2016). Thirdly, when targeting  
886 health and disease monitoring, clinical signs such as nasal discharge and diarrhoea are non-  
887 specific and cannot be used as evidence in diagnosis (Rahimian et al., 2012); and advanced  
888 diagnostic methods including ELISA and real-time RT-PCR are only useful when daily  
889 monitoring shows the necessity, because of their requirements for expert personnel, expensive  
890 equipment, and time-consuming and costly processes (Soltan et al., 2016).

891

892 Precision livestock farming and smart agriculture are calling for novel and automatic systems  
893 that are effective, efficient and affordable, and which meet variable goals to satisfy the purposes  
894 of monitoring the health, activity and welfare of chickens (Banakar et al., 2016). The ideal  
895 system would be an automatic device with an alarm feature, which is technologically simplified  
896 enough to be understandable and usable by farmers to assist in their daily monitoring of welfare,  
897 such as activities and conditions of the birds

898

899 Recent development of scientific research and technology in chickens and other livestock  
900 indicates that vocalisation monitoring could be a valuable tool for predicting diseases and

901 enhancing productivity. Vocalisation technology is based on sounds made by the birds in their  
902 daily activities on the farms. The acoustic monitoring system was first developed to monitor  
903 coughing in porcine livestock farms, which found coughing to be an indicator of animal  
904 conditions, as it is a frequent symptom of multiple respiratory diseases affecting the lungs of  
905 livestock (Chedad et al., 2001). The new acoustic technology using neural networks as  
906 classification methods can distinguish cough sounds from other sounds such as metal clanging,  
907 grunts, and background noises. Using the nanobiosensors, vocalisation detection can be designed  
908 and developed as an efficient, effective and affordable system in monitoring the health  
909 conditions of chickens, to provide opportunities for making decisions and undertaking necessary  
910 actions.

911  
912 Further development of the acoustic technology to detect porcine coughing contributed to a user-  
913 friendly computer software system called Cool Edit Program (Gutierrez et al., 2010). With the  
914 PC software system installed in porcine livestock farms, the farmers can monitor and initially  
915 diagnose pigs with wasting diseases on breeding farms in real time based on the online cough  
916 counter algorithm. An efficient data-mining technology was used to detect and recognise sounds  
917 from pigs with or without wasting diseases, and the sound data were collected in audio  
918 surveillance systems (Chung et al., 2013). Post sound acquisition, the widely used Mel  
919 Frequency Cepstrum Coefficient (MFCC) sound analysis technology was used to extract and  
920 differentiate sound data in the data pre-processing phase. Further development of the coughing  
921 sound recognition system used the Support Vector Data Description (SVDD) technology to  
922 enhance the automatic monitoring system. The SVDD worked as an anomaly or novelty detector  
923 to detect sound data related to porcine wasting diseases. Finally, the Sparse Representation

924 Classifier (SRC) technology was used to classify the sound data based on their relations to  
925 different sub-types of porcine wasting diseases. Using the combination of MFCC, SVDD and  
926 SRC technology, the study yielded up to 94% disease detection and 91% classification accuracy  
927 of porcine wasting diseases.

928

929 The vocalisation- and acoustic-detection technology developed for pig coughing systems cannot  
930 be directly applied to poultry farms due to the types and the frequencies of the sounds the  
931 chickens make. The early exploration of the relation between vocalisation and poultry livestock  
932 welfare can be traced back to 1953 (Collias and Joos, 1953), and a great number of different  
933 vocalisation sounds, up to 30, have been described for juvenile and adult chickens (Manteuffel et  
934 al., 2004). The vocalisation system can allow the detection of signs of welfare as gavel-calls,  
935 alarm calls, distress calls, and stress calls through their sound analysis, indicating the levels of  
936 energy, frequency, and call duration, to detect normal welfare or impaired welfare. The socially  
937 relevant utterances will depend on complex contexts, but not solely on reactions to simple  
938 internal states and external stimuli. For example, the hens' calls can be differentiated from cocks'  
939 calls, and food calls from brooding hens to their chicks have a higher probability of occurrence  
940 when the chicks are not feeding or are at a distance (Wauters and Richard- Yris, 2002).

941

942 Bioacoustics from poultry farms can also help to identify genetic strains and sexes of the birds,  
943 in which the genetic strains can be identified using the second formant frequency and the pitch of  
944 the sounds; and the sexes can be identified using the second formant frequency apart from the  
945 sounds (Pereira et al., 2015a). An in-depth and comprehensive development of the acoustic  
946 system can detect the key vocalisation frequency and pattern changes in routine activities of the

947 birds, and identify the age and weight of young broiler chickens based on the audio monitoring  
948 and comparison of anticipated sound patterns (Fontana et al., 2016). Figure 7 shows a schematic  
949 representation of how a well-designed intelligent technology using a vocalisation-detection  
950 system can monitor welfare and diagnose diverse infectious diseases in farmed chickens. Sound  
951 signals collected using microphones and a data collection card analysed by a neural network  
952 pattern-recognition system can detect and diagnose necrotic enteritis derived from the infection  
953 of *Clostridium perfringens* type A (Sadeghi et al., 2015). The diagnostic accuracy was 66.6% on  
954 day 2, and 100% on day 8 post the disease onset. Another study compared three different sound-  
955 detecting systems in the diagnosis of three avian infectious diseases with heavy economic losses:  
956 Newcastle Disease, Bronchitis Virus, and Avian Influenza (Banakar et al., 2016). The three  
957 systems were sound and time frequency detection alone, the Support Vector Data Description  
958 system (SVDD) (Chung et al., 2013), and an artificially intelligent device using SVDD as an  
959 input for intelligent analysis (Sadeghi et al., 2015). The results showed that the diagnostic  
960 accuracy from frequency detection was 41.4%, from SVDD was 83.3%, and from the artificially  
961 intelligent device was 91.2%. These results indicate that the combination of SVDD technology  
962 and artificially intelligent technology could yield the most accurate diagnosis in detecting poultry  
963 diseases from bioacoustics.

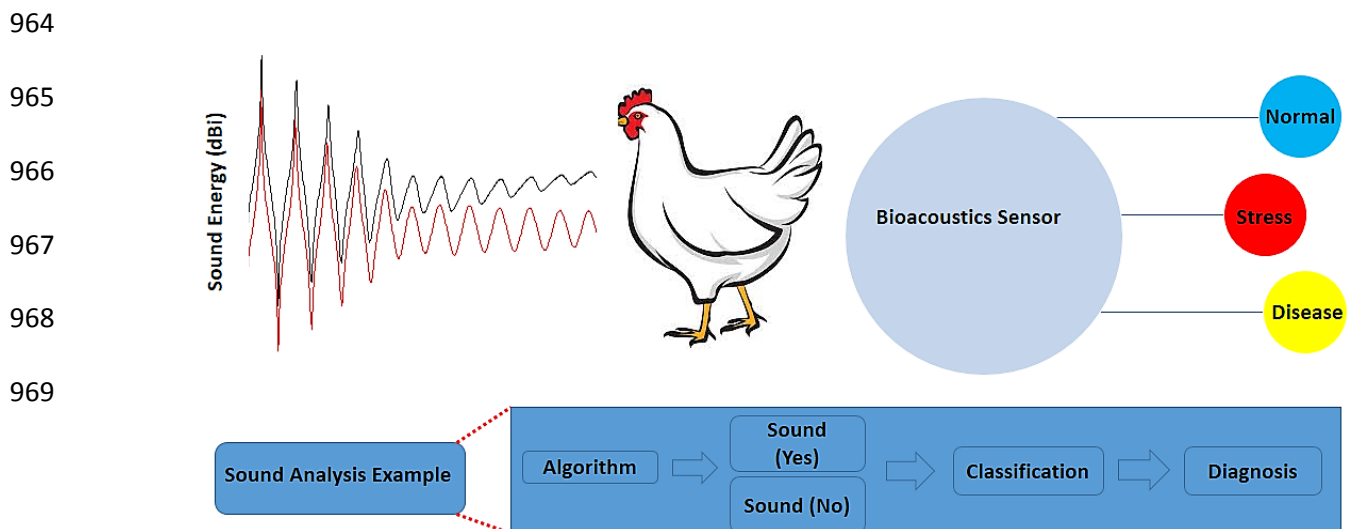

970

971

972 **Figure 7.** Schematic representation of the use of bioacoustics analysis for detection of wellbeing  
973 in poultry livestock.

974

## 975 **10. Perspectives**

976

977 Precision livestock farming aims at creating a management system that relies upon autonomous,  
978 continuous, real-time monitoring and control of all aspects of livestock management, including  
979 reproduction, animal health and welfare, and the environmental impact of livestock production.

980 It is assumed that the direct monitoring of animals will achieve greater control over their health  
981 status, which will eventually translate into better animal product quality over longer periods of  
982 time. Biosensor technology shall enable accurate and affordable acquisition of data points, while  
983 the smart algorithms, coupled with networked farms, shall further decision making and  
984 management processes in the animal farms. The primary goal of precision livestock farming is to  
985 generate reliable data using biosensors and run it through intelligent software systems to create  
986 value for the farmer, the environment, and the animals in the form of improved animal health and  
987 welfare, increased productivity and yields and reduced costs while minimising the impact on the  
988 environment.

989

990 While the biosensor technology is available for individual parameters, key advancements in the  
991 field are expected to generate robust monitoring systems for a multitude of parameters. Another  
992 key challenge currently faced is the slow uptake of these technologies on commercial farms. This  
993 has been attributed to the fact that although the precision systems and biosensors generate

994 abundant data, the data is currently not being converted into useful information that could be  
995 utilised for the decision-making process in livestock management. Furthermore, the economic  
996 benefits of using these advanced systems is set to be demonstrated to individual farmers, who are  
997 reluctant to make investments in these systems in the absence of a clear economic benefit.

998  
999 There is no doubt that advancements in the development of nanobiosensors, combining  
1000 nanotechnology with highly specific analytic techniques for metabolic biomolecules and  
1001 surveillance systems for monitoring animal health and welfare will be ubiquitously used to  
1002 manage livestock farms and prevent disease outbreak. The key challenges that remain to be  
1003 resolved include harmonisation of methods across various platforms and large-scale  
1004 implementation of data analysis and sharing technologies.

1005

1006 *Table 2. Biosensor applications in animal health monitoring*

| <b>Biosensor</b>       | <b>Application</b> | <b>Reference</b>                                                            |
|------------------------|--------------------|-----------------------------------------------------------------------------|
| <b>Grazing/Feeding</b> | Pressure           | (Braun et al., 2013; Nydegger et al.,                                       |
| <b>Behaviour</b>       | sensing            | 2010; Pahl et al., 2016; Rutter et al.,<br>1997)                            |
|                        | Acoustic           | (Benvenuti et al., 2016; Navon et al.,                                      |
|                        | sensing            | 2013)                                                                       |
|                        | Acceleration       | (Giovanetti et al., 2017; Herinaina et                                      |
|                        | sensors            | al., 2016; Mattachini et al., 2016;<br>Oudshoorn et al., 2013; Tani et al., |





|                                        |                                           |                  |                                                                                                                                    |
|----------------------------------------|-------------------------------------------|------------------|------------------------------------------------------------------------------------------------------------------------------------|
|                                        | Respiratory                               |                  | 2016)                                                                                                                              |
|                                        | Disease                                   |                  |                                                                                                                                    |
| <b>Uric Acid</b>                       |                                           | Physical stress, | (Kim et al., 2015)                                                                                                                 |
|                                        |                                           | renal            |                                                                                                                                    |
|                                        |                                           | metabolism       |                                                                                                                                    |
| <b>Volatile Organic Compounds</b>      | <i>Mycobacterium bovis</i>                | Cattle           | (Ellis et al., 2014; Fend et al., 2005; Peled et al., 2012)                                                                        |
| <b>Reproductive Health Monitoring</b>  | Cattle oestrus cycle                      |                  | (Andersson et al., 2016; Andersson et al., 2015; Jónsson et al., 2011; Vanrell et al., 2014; Vreeburg, 2010a; Zeidan et al., 2016) |
| <b>Integrative Wireless Monitoring</b> |                                           | Pigs             | (De Groot et al., 2012)                                                                                                            |
| <b>Beehive Management</b>              | Monitoring bee health beehive environment | Bees             | (Bromenshenk et al., 2015; Evans, 2015; Meikle and Holst, 2015)                                                                    |

1007

1008

1009 *Table 3. Biosensor Transducers and Applications*

| <b>Transducer system</b> | <b>Principle</b>            | <b>Applications</b>                                                                  |
|--------------------------|-----------------------------|--------------------------------------------------------------------------------------|
| SPR                      | Changes in refractive index | Urea detection (Frasconi et al., 2009; Mitchell et al., 2009; Mitchell et al., 2009) |

|                                                               |                         |                                                                   |                                                                    |
|---------------------------------------------------------------|-------------------------|-------------------------------------------------------------------|--------------------------------------------------------------------|
|                                                               |                         | Cortisol detection                                                | al., 2009; Mitchell et al., 2005)                                  |
|                                                               |                         |                                                                   | Reviewed in (Mitchell, 2010)                                       |
| Single-walled carbon nanotube arrays                          | Amperometric            | Glucose sensors                                                   | (Liu et al., 2005)                                                 |
| Piezoelectric crystal                                         | Mass change             | Volatile gasses and vapours                                       |                                                                    |
| Thermistor                                                    | Calorimetric            | Enzyme, organelle, whole cell or tissue                           | (Fine et al., 2010) Reviewed in (Sun et al., 2012)                 |
|                                                               |                         | Products, gasses, pollutants, antibiotics, vitamins, etc.         |                                                                    |
| Optoelectronic/wave guide and fibre optic device/Quantum dots | Optical pH, colorimetry | Enzyme substrates and immunological systems                       | (Neethirajan et al., 2016; Weng et al., 2015a; Weng et al., 2015b) |
| Ion-sensitive electrode (ISE)                                 | Potentiometric          | Ions in biological media, enzyme electrodes, enzyme immunosensors | (Rose et al., 2015) (Kim et al., 2015)                             |
| Field effect transistor                                       | Potentiometric          | Ions, gasses, enzyme                                              | (Tarasov et al.,                                                   |

|       |                        |       |
|-------|------------------------|-------|
| (FET) | substrates and         | 2016) |
|       | immunological analytes |       |

1010

1011

1012

1013

## 1014 11. Acknowledgments

1015 The authors sincerely thank the Natural Sciences and Engineering Research Council of Canada  
1016 (400929) and the Ontario Ministry of Agriculture, Food and Rural Affairs (300512) for funding  
1017 this study.

1018

## 1019 12. References

1020

1021 Alexandratos, N., Bruinsma, J., 2012. World agriculture towards 2030/2050: the 2012 revision.  
1022 ESA Working paper Rome, FAO.

1023 Andersson, L.M., Okada, H., Miura, R., Zhang, Y., Yoshioka, K., Aso, H., Itoh, T., 2016.  
1024 Wearable wireless estrus detection sensor for cows. *Computers and Electronics in Agriculture*  
1025 127, 101-108.

1026 Andersson, L.M., Okada, H., Zhang, Y., Itoh, T., Miura, R., Yoshioka, K., 2015. Wearable  
1027 wireless sensor for estrus detection in cows by conductivity and temperature measurements.  
1028 *IEEE SENSORS*, pp. 1-4.

1029 Andriamandroso, A., Lebeau, F., Bindelle, J., 2015. Changes in biting characteristics recorded  
1030 using the inertial measurement unit of a smartphone reflect differences in sward attributes. In:

- 1031 M., G., D., B. (Eds.), Proceedings of the 7th European conference on Precision Livestock  
1032 Farming, Precision Livestock Farming, pp. 283-289, Milan, Italy.
- 1033 Bai, H., Wang, R., Hargis, B., Lu, H., Li, Y., 2012. A SPR Aptasensor for Detection of Avian  
1034 Influenza Virus H5N1. *Sensors* 12(9), 12506-12518.
- 1035 Banakar, A., Sadeghi, M., Shushtari, A., 2016. An intelligent device for diagnosing avian  
1036 diseases. *Comput. Electron. Agric.* 127, 744-753.
- 1037 Bandodkar, A.J., Wang, J., 2014. Non-invasive wearable electrochemical sensors: a review.  
1038 *Trends in Biotechnology* 32(7), 363-371.
- 1039 Barth, F.G., Hrncir, M., Tautz, J., 2005. Vibratory and airborne-sound signals in bee  
1040 communication (Hymenoptera). *Insect Sounds and Communication: Physiology, Behaviour,  
1041 Ecology, and Evolution*, pp. 421-436. CRC Press.
- 1042 Benvenuti, M.A., Pavetti, D.R., Poppi, D.P., Gordon, I.J., Cangiano, C.A., 2016. Defoliation  
1043 patterns and their implications for the management of vegetative tropical pastures to control  
1044 intake and diet quality by cattle. *Grass and Forage Science* 71(3), 424-436.
- 1045 Berckmans, D., 2006. Automatic on-line monitoring of animals by precision livestock farming.  
1046 *Livestock production and society* 287.
- 1047 Bhatta, D., Villalba, M.M., Johnson, C.L., Emmerson, G.D., Ferris, N.P., King, D.P., Lowe,  
1048 C.R., 2012. Rapid Detection of Foot-and-Mouth Disease Virus with Optical Microchip Sensors.  
1049 *Procedia Chemistry* 6, 2-10.
- 1050 Blom, J., Ridder, C., 2010. Reproductive Management and Performance Can be Improved by  
1051 Use of DeLaval Herd Navigator®. *The First North American Conference on Precision Dairy  
1052 Management*.

- 1053 Braun, U., Trösch, L., Nydegger, F., Hässig, M., 2013. Evaluation of eating and rumination  
1054 behaviour in cows using a noseband pressure sensor. *BMC Veterinary Research* 9(1), 164.
- 1055 Bromenshenk, J.J., Henderson, C.B., Seccomb, R.A., Welch, P.M., Debnam, S.E., Firth, D.R.,  
1056 2015. Bees as biosensors: chemosensory ability, honey bee monitoring systems, and emergent  
1057 sensor technologies derived from the pollinator syndrome. *Biosensors* 5(4), 678-711.
- 1058 Burciaga-Robles, L.O., Holland, B.P., Step, D.L., Krehbiel, C.R., McMillen, G.L., Richards,  
1059 C.J., Sims, L.E., Jeffers, J.D., Namjou, K., McCann, P.J., 2009. Evaluation of breath biomarkers  
1060 and serum haptoglobin concentration for diagnosis of bovine respiratory disease in heifers newly  
1061 arrived at a feedlot. *American journal of veterinary research* 70(10), 1291-1298.
- 1062 Caja, G., Castro-Costa, A., Knight, C.H., 2016. Engineering to support wellbeing of dairy  
1063 animals. *Journal of Dairy Research* 83(2), 136-147.
- 1064 Calvet, S., Campelo, J.C., Estellés, F., Perles, A., Mercado, R., Serrano, J.J., 2014. Suitability  
1065 evaluation of multipoint simultaneous CO<sub>2</sub> sampling wireless sensors for livestock buildings.  
1066 *Sensors* 14(6), 10479-10496.
- 1067 Chedad, A., Moshou, D., Aerts, J.-M., Van Hirtum, A., Ramon, H., Berckmans, D., 2001. AP—  
1068 animal production technology: recognition system for pig cough based on probabilistic neural  
1069 networks. *Journal of agricultural engineering research* 79(4), 449-457.
- 1070 Chen, L., Ye, S., Cai, K., Zhang, C., Zhou, G., He, Z., Han, H., 2015a. An aqueous platinum  
1071 nanotube based fluorescent immuno-assay for porcine reproductive and respiratory syndrome  
1072 virus detection. *Talanta* 144, 324-328.
- 1073 Chen, Y., Arsenault, R., Napper, S., Griebel, P., 2015b. Models and Methods to Investigate  
1074 Acute Stress Responses in Cattle. *Animals* 5(4), 0411.

- 1075 Chen, Y., Huang, C.-H., Hou, C., Huo, D., Jin, G., 2013. Rapid and Label-Free Detection of  
1076 Porcine Reproductive and Respiratory Syndrome Virus on Nanoscale by Biosensor Based on  
1077 Imaging Ellipsometry. *Integrated Ferroelectrics* 145(1), 122-129.
- 1078 Chepete, H., Xin, H., Mendes, L., Li, H., Bailey, T., 2012. Ammonia emission and performance  
1079 of laying hens as affected by different dosages of *Yucca schidigera* in the diet. *The Journal of*  
1080 *Applied Poultry Research* 21(3), 522-530.
- 1081 Chiron, G., Gomez-Krämer, P., Ménard, M., 2013. Outdoor 3D Acquisition System for Small  
1082 and Fast Targets. Application to honeybee monitoring at the beehive entrance. *GEODIFF 2013*,  
1083 pp. 10-19, Barcelona, France.
- 1084 Christensen, L.S., Brehm, K.E., Skov, J., Harlow, K.W., Christensen, J., Haas, B., 2011.  
1085 Detection of foot-and-mouth disease virus in the breath of infected cattle using a hand-held  
1086 device to collect aerosols. *Journal of virological methods* 177(1), 44-48.
- 1087 Chung, Y., Oh, S., Lee, J., Park, D., Chang, H.-H., Kim, S., 2013. Automatic detection and  
1088 recognition of pig wasting diseases using sound data in audio surveillance systems. *Sensors*  
1089 13(10), 12929-12942.
- 1090 Clapham, W.M., Fedders, J.M., Beeman, K., Neel, J.P., 2011. Acoustic monitoring system to  
1091 quantify ingestive behavior of free-grazing cattle. *Computers and Electronics in Agriculture*  
1092 76(1), 96-104.
- 1093 Collias, N., Joos, M., 1953. The spectrographic analysis of sound signals of the domestic fowl.  
1094 *Behaviour* 5(1), 175-188.
- 1095 Cook, N.J., 2012. Review: Minimally invasive sampling media and the measurement of  
1096 corticosteroids as biomarkers of stress in animals. *Canadian Journal of Animal Science* 92(3),  
1097 227-259.

- 1098 Da Silva, N., Zardoya, R., Santurde, G., Solana, A., Castro, J., 1995. Rapid and sensitive  
1099 detection of the bovine viral diarrhoea virus genome in semen. *Journal of virological methods*  
1100 55(2), 209-218.
- 1101 Davis, J.D., 2007a. Remote characterization of locomotion, grazing and drinking behavior in  
1102 beef cattle using GPS and ruminant temperature dynamics. ProQuest.
- 1103 Davis, J.D.L., 2007b. Remote Characterization of Locomotion, Grazing and Drinking Behavior  
1104 in Beef Cattle Using GPS and Ruminant Temperature Dynamics. Iowa State University.
- 1105 De Groot, D., Slieker, R., Van Loo, P., Verheij, E., Lorentsen, H., Laursen, M., Markert, M.,  
1106 Masse, F., Bouwens, F., Integrative Wireless Monitoring of Minipigs. *Newsletter 38 Autumn*  
1107 2012 pp 11-17.
- 1108 Dietlein, D.G., 1985. A Method for Remote Monitoring of Activity of Honeybee Colonies by  
1109 Sound Analysis. *Journal of Apicultural Research* 24(3), 176-183.
- 1110 Diouani, M.F., Helali, S., Hafaid, I., Hassen, W.M., Snoussi, M.A., Ghram, A., Jaffrezic-  
1111 Renault, N., Abdelghani, A., 2008. Miniaturized biosensor for avian influenza virus detection.  
1112 *Materials Science and Engineering: C* 28(5–6), 580-583.
- 1113 Duarte, C., Costa, T., Carneiro, C., Soares, R., Jitariu, A., Cardoso, S., Piedade, M., Bexiga, R.,  
1114 Freitas, P., 2016. Semi-Quantitative Method for Streptococci Magnetic Detection in Raw Milk.  
1115 *Biosensors* 6(2), 19.
- 1116 Durkin, J., DeLaval, B.W., 2010. Heat detection: Trends and opportunities. *Proc. Second North*  
1117 *Am. Conf. Precision Dairy Management, Toronto, Canada*, pp. 1-10.
- 1118 Ellis, C.K., Stahl, R.S., Nol, P., Waters, W.R., Palmer, M.V., Rhyan, J.C., VerCauteren, K.C.,  
1119 McCollum, M., Salman, M.D., 2014. A pilot study exploring the use of breath analysis to



1120 differentiate healthy cattle from cattle experimentally infected with *Mycobacterium bovis*. PLoS  
1121 One 9(2), e89280.

1122 Evans, S.K., 2015. Electronic beehive monitoring—applications to research. Julius-Kühn-Archiv  
1123 0(450), 121.

1124 Fend, R., Geddes, R., Lesellier, S., Vordermeier, H.-M., Corner, L.A.L., Gormley, E., Costello,  
1125 E., Hewinson, R.G., Marlin, D.J., Woodman, A.C., Chambers, M.A., 2005. Use of an Electronic  
1126 Nose To Diagnose *Mycobacterium bovis* Infection in Badgers and Cattle. Journal of Clinical  
1127 Microbiology 43(4), 1745-1751.

1128 Fine, G.F., Cavanagh, L.M., Afonja, A., Binions, R., 2010. Metal oxide semi-conductor gas  
1129 sensors in environmental monitoring. Sensors 10(6), 5469-5502.

1130 Fontana, I., Tullo, E., Scrase, A., Butterworth, A., 2016. Vocalisation sound pattern  
1131 identification in young broiler chickens. Animal : an international Journal of Animal Bioscience  
1132 10(09), 1567-1574.

1133 Force, A. T., 2015. Critical role of animal science research in food security and sustainability.  
1134 The National Academies Press, Washington, DC.

1135 Frasconi, M., Mazzarino, M., Botre, F., Mazzei, F., 2009. Surface plasmon resonance  
1136 immunosensor for cortisol and cortisone determination. Anal Bioanal Chem 394(8), 2151-2159.

1137 Frish, M.B., 2014. Current and emerging laser sensors for greenhouse gas sensing and leak  
1138 detection. SPIE Sensing Technology+ Applications, pp. 91010H--91012. International Society  
1139 for Optics and Photonics.

1140 Fuentes, M., Tecles, F., Gutiérrez, A., Otal, J., Martínez-Subiela, S., Cerón, J.J., 2011. Validation  
1141 of an Automated Method for Salivary Alpha-Amylase Measurements in Pigs (*Sus Scrofa*

- 1142 Domesticus) and its Application as a Stress Biomarker. *Journal of Veterinary Diagnostic*  
1143 *Investigation* 23(2), 282-287.
- 1144 Fűtő, P., Markus, G., Kiss, A., Adányi, N., 2012. Development of a Catalase-Based  
1145 Amperometric Biosensor for the Determination of Increased Catalase Content in Milk Samples.  
1146 *Electroanalysis* 24(1), 107-113.
- 1147 Gajendragad, M.R., Kamath, K.N.Y., Anil, P.Y., Prabhudas, K., Natarajan, C., 2001.  
1148 Development and standardization of a piezo electric immunobiosensor for foot and mouth  
1149 disease virus typing. *Veterinary Microbiology* 78(4), 319-330.
- 1150 Gao, W., Emaminejad, S., Nyein, H.Y.Y., Challa, S., Chen, K., Peck, A., Fahad, H.M., Ota, H.,  
1151 Shiraki, H., Kiriya, D., Lien, D.-H., Brooks, G.A., Davis, R.W., Javey, A., 2016. Fully integrated  
1152 wearable sensor arrays for multiplexed in situ perspiration analysis. *Nature* 529(7587), 509-514.
- 1153 Garner, C.E., Smith, S., Bardhan, P.K., Ratcliffe, N.M., Probert, C.S., 2009. A pilot study of  
1154 faecal volatile organic compounds in faeces from cholera patients in Bangladesh to determine  
1155 their utility in disease diagnosis. *Transactions of the Royal Society of Tropical Medicine and*  
1156 *Hygiene* 103(11), 1171-1173.
- 1157 Giovanetti, V., Decandia, M., Molle, G., Acciaro, M., Mameli, M., Cabiddu, A., Cossu, R.,  
1158 Serra, M.G., Manca, C., Rassu, S.P.G., Dimauro, C., 2017. Automatic classification system for  
1159 grazing, ruminating and resting behaviour of dairy sheep using a tri-axial accelerometer.  
1160 *Livestock Science* 196, 42-48.
- 1161 Gomes, P., Giralt, E., Andreu, D., 1999. Surface plasmon resonance screening of synthetic  
1162 peptides mimicking the immunodominant region of C-S8c1 foot-and-mouth disease virus.  
1163 *Vaccine* 18(3-4), 362-370.

- 1164 Grant, S.A., Heits, B., Kleiboeker, S., 2006. Development of an Optical Biosensor Utilizing  
1165 GoldNanoparticles to Detect Porcine Reproductive and Respiratory Syndrome Virus. *Sensor*  
1166 *Letters* 4(3), 246-252.
- 1167 Gumus, A., Lee, S., Karlsson, K., Gabrielson, R., Winkler, D., Erickson, D., 2014. Real-time in  
1168 vivo uric acid biosensor system for biophysical monitoring of birds. *Analyst* 139(4), 742-748.
- 1169 Guo, D., Zhuo, M., Zhang, X., Xu, C., Jiang, J., Gao, F., Wan, Q., Li, Q., Wang, T., 2013.  
1170 Indium-tin-oxide thin film transistor biosensors for label-free detection of avian influenza virus  
1171 H5N1. *Analytica Chimica Acta* 773, 83-88.
- 1172 Gutierrez, W., Kim, S., Kim, D., Yeon, S., Chang, H., 2010. Classification of porcine wasting  
1173 diseases using sound analysis. *Asian-Australasian Journal of Animal Sciences* 23(8), 1096-1104.
- 1174 Halachmi, I., Guarino, M., 2016. Editorial: Precision livestock farming: a ‘per animal’ approach  
1175 using advanced monitoring technologies. *Animal : an international journal of animal bioscience*  
1176 10(9), 1482-1483.
- 1177 Hassouna, M., Robin, P., Charpiot, A., Edouard, N., Méda, B., 2013. Infrared photoacoustic  
1178 spectroscopy in animal houses: Effect of non-compensated interferences on ammonia, nitrous  
1179 oxide and methane air concentrations. *Biosystems Engineering* 114(3), 318-326.
- 1180 He, Y., Zhang, Y.-j., Xia, H., Geng, H., Ruan, J., Wang, M., 2009. Open-path online monitoring  
1181 of ambient atmospheric co<sub>2</sub> based on laser absorption spectrum. *Spectroscopy and Spectral*  
1182 *Analysis* 29(1), 10-13.
- 1183 Hearps, A., Zhang, Z., Alexandersen, S., 2002. Evaluation of the portable Cepheid SmartCycler  
1184 real-time PCR machine for the rapid diagnosis of foot-and-mouth disease. *Veterinary Record*  
1185 150(20), 625-628.

1186 Heinze, B.C., Song, J.-Y., Lee, C.-H., Najam, A., Yoon, J.-Y., 2009. Microfluidic immunosensor  
1187 for rapid and sensitive detection of bovine viral diarrhea virus. *Sensors and Actuators B:*  
1188 *Chemical* 138(2), 491-496.

1189 Hellsten, Y., Tullson, P.C., Richter, E.A., Bangsbo, J., 1997. Oxidation of urate in human  
1190 skeletal muscle during exercise. *Free radical biology & medicine* 22(1-2), 169-174.

1191 Herinaina, A.L., Bindelle, J., Mercatoris, B., Lebeau, F., 2016. A review on the use of sensors to  
1192 monitor cattle jaw movements and behavior when grazing. *Biotechnology, Agronomy, Society*  
1193 *and Environment* 23(S1), 273-286.

1194 Hibi, K., Hatanaka, K., Takase, M., Ren, H., Endo, H., 2012. Wireless biosensor system for real-  
1195 time L-lactic acid monitoring in fish. *Sensors* 12(5), 6269-6281.

1196 Hodgkinson, J., Smith, R., Ho, W.O., Saffell, J.R., Tatam, R.P., 2013. Non-dispersive infra-red  
1197 (NDIR) measurement of carbon dioxide at 4.2  $\mu\text{m}$  in a compact and optically efficient sensor.  
1198 *Sensors and Actuators B: Chemical* 186, 580-588.

1199 Hogeveen, H., Kamphuis, C., Steeneveld, W., Mollenhorst, H., 2010. *Sensors and Clinical*  
1200 *Mastitis—The Quest for the Perfect Alert. Sensors (Basel, Switzerland)* 10(9), 7991-8009.

1201 Holtkamp, D.J., Kliebenstein, J.B., Neumann, E.J., 2013. Assessment of the economic impact of  
1202 porcine reproductive and respiratory syndrome virus on United States pork producers. *JSHAP*  
1203 21(2), 72-84.

1204 Iguchi, S., Kudo, H., Saito, T., Ogawa, M., Saito, H., Otsuka, K., Funakubo, A., Mitsubayashi,  
1205 K., 2007. A flexible and wearable biosensor for tear glucose measurement. *Biomedical*  
1206 *Microdevices* 9(4), 603-609.

1207 Ingram, B., Gavine, F., Lawson, P., 2005. *Fish Health Management Guidelines for Farmed*  
1208 *Murray Cod., Fisheries Victoria Research Report.*

- 1209 Jegadeesan, S., Venkatesan, G.P., 2016. Smart cow health monitoring, farm environmental  
1210 monitoring and control system using wireless sensor networks. *Int. J. Adv. Eng. Tech./Vol*  
1211 *VII/Issue I/Jan–March* 334, 339.
- 1212 Jia, W., Bandodkar, A.J., Valdés-Ramírez, G., Windmiller, J.R., Yang, Z., Ramírez, J., Chan, G.,  
1213 Wang, J., 2013. Electrochemical Tattoo Biosensors for Real-Time Noninvasive Lactate  
1214 Monitoring in Human Perspiration. *Analytical chemistry* 85(14), 6553-6560.
- 1215 Jindal, K., Tomar, M., Gupta, V., 2012. CuO thin film based uric acid biosensor with enhanced  
1216 response characteristics. *Biosensors and Bioelectronics* 38(1), 11-18.
- 1217 Jónsson, R., Blanke, M., Poulsen, N.K., Caponetti, F., Højsgaard, S., 2011. Oestrus detection in  
1218 dairy cows from activity and lying data using on-line individual models. *Computers and*  
1219 *Electronics in Agriculture* 76(1), 6-15.
- 1220 Kim, J., Imani, S., de Araujo, W.R., Warchall, J., Valdés-Ramírez, G., Paixão, T.R.L.C.,  
1221 Mercier, P.P., Wang, J., 2015. Wearable salivary uric acid mouthguard biosensor with integrated  
1222 wireless electronics. *Biosensors and Bioelectronics* 74, 1061-1068.
- 1223 Kim, S.B., Takenaka, Y., Torimura, M., 2011. A Bioluminescent Probe for Salivary Cortisol.  
1224 *Bioconjugate Chemistry* 22(9), 1835-1841.
- 1225 Knobloch, H., Köhler, H., Commander, N., Reinhold, P., Turner, C., Chambers, M., Pardo, M.,  
1226 Sberveglieri, G., 2009. Volatile organic compound (VOC) analysis for disease detection: proof  
1227 of principle for field studies detecting paratuberculosis and brucellosis. *AIP Conference*  
1228 *Proceedings*, pp. 195-197. AIP.
- 1229 Kridi, D.S., Carvalho, C.G.N.d., Gomes, D.G., 2016. Application of wireless sensor networks for  
1230 beehive monitoring and in-hive thermal patterns detection. *Comput. Electron. Agric.* 127, 221-  
1231 235.

- 1232 Kumanan, V., Nugen, S.R., Baeumner, A.J., Chang, Y.-F., 2009. A biosensor assay for the  
1233 detection of *Mycobacterium avium* subsp. paratuberculosis in fecal samples. *J Vet Sci* 10(1), 35-  
1234 42.
- 1235 La Belle, J.T., Engelschall, E., Lan, K., Shah, P., Saez, N., Maxwell, S., Adamson, T., Abou-Eid,  
1236 M., McAferty, K., Patel, D.R., Cook, C.B., 2014. A Disposable Tear Glucose Biosensor-Part 4:  
1237 Preliminary Animal Model Study Assessing Efficacy, Safety, and Feasibility. *J Diabetes Sci*  
1238 *Technol* 8(1), 109-116.
- 1239 Laca, WallisDeVries, 2000. Acoustic measurement of intake and grazing behaviour of cattle.  
1240 *Grass and Forage Science* 55(2), 97-104.
- 1241 Lee, S.J., Kwon, Y.S., Lee, J.-e., Choi, E.-J., Lee, C.-H., Song, J.-Y., Gu, M.B., 2013. Detection  
1242 of VR-2332 Strain of Porcine Reproductive and Respiratory Syndrome Virus Type II Using an  
1243 Aptamer-Based Sandwich-Type Assay. *Analytical chemistry* 85(1), 66-74.
- 1244 Leonardi, S., Marchesi, G., Tangorra, F.M., Lazzari, M., 2013. Use of a proactive herd  
1245 management system in a dairy farm of northern italy: technical and economic results. *Journal of*  
1246 *Agricultural Engineering* 44(2s).
- 1247 Leopold, J.H., van Hooijdonk, R.T., Sterk, P.J., Abu-Hanna, A., Schultz, M.J., Bos, L.D., 2014.  
1248 Glucose prediction by analysis of exhaled metabolites - a systematic review. *BMC*  
1249 *anesthesiology* 14, 46.
- 1250 Li, D., Wang, J., Wang, R., Li, Y., Abi-Ghanem, D., Berghman, L., Hargis, B., Lu, H., 2011. A  
1251 nanobeads amplified QCM immunosensor for the detection of avian influenza virus H5N1.  
1252 *Biosensors and Bioelectronics* 26(10), 4146-4154.

- 1253 Liu, J., Chou, A., Rahmat, W., Paddon- Row, M.N., Gooding, J.J., 2005. Achieving direct  
1254 electrical connection to glucose oxidase using aligned single walled carbon nanotube arrays.  
1255 *Electroanalysis* 17(1), 38-46.
- 1256 Lum, J., Wang, R., Lassiter, K., Srinivasan, B., Abi-Ghanem, D., Berghman, L., Hargis, B.,  
1257 Tung, S., Lu, H., Li, Y., 2012. Rapid detection of avian influenza H5N1 virus using impedance  
1258 measurement of immuno-reaction coupled with RBC amplification. *Biosensors and*  
1259 *Bioelectronics* 38(1), 67-73.
- 1260 Luo, Y., Nartker, S., Miller, H., Hochhalter, D., Wiederoder, M., Wiederoder, S., Settingington,  
1261 E., Drzal, L.T., Alocilja, E.C., 2010. Surface functionalization of electrospun nanofibers for  
1262 detecting *E. coli* O157:H7 and BVDV cells in a direct-charge transfer biosensor. *Biosensors and*  
1263 *Bioelectronics* 26(4), 1612-1617.
- 1264 Malon, R.S.P., Sadir, S., Balakrishnan, M., #xf3, rcoles, E.P., 2014. Saliva-Based Biosensors:  
1265 Noninvasive Monitoring Tool for Clinical Diagnostics. *BioMed Research International* 2014, 20.
- 1266 Manteuffel, G., Puppe, B., Schön, P.C., 2004. Vocalization of farm animals as a measure of  
1267 welfare. *Applied Animal Behaviour Science* 88(1), 163-182.
- 1268 MarketsandMarkets, Precision Farming Market by Technology (Guidance System, Remote  
1269 Sensing, Variable Rate Technology), Offering (Hardware Automation & Control System, Sensor  
1270 & Monitoring Device, Software, Services), Application, and Geography - Global Forecast to  
1271 2022
- 1272 Martinez-Pérez, D., Ferrer, M.L., Mateo, C.R., 2003. A reagent less fluorescent sol-gel  
1273 biosensor for uric acid detection in biological fluids. *Analytical Biochemistry* 322(2), 238-242.
- 1274 Mattachini, G., Riva, E., Perazzolo, F., Naldi, E., Provolo, G., 2016. Monitoring feeding  
1275 behaviour of dairy cows using accelerometers. *Journal of Agricultural Engineering* 47(1), 54-58.

- 1276 Mazeris, F., 2010. DeLaval herd navigator: proactive herd management. Proceedings of First  
1277 North American Conference on Precision Dairy Management, pp. 26-27.
- 1278 McNerney, R., Wondafrash, B.A., Amena, K., Tesfaye, A., McCash, E.M., Murray, N.J., 2010.  
1279 Field test of a novel detection device for Mycobacterium tuberculosis antigen in cough. BMC  
1280 infectious diseases 10, 161.
- 1281 Meikle, W., Holst, N., 2015. Application of continuous monitoring of honeybee colonies.  
1282 Apidologie 46(1), 10-22.
- 1283 Mendes, L., Ogink, N., Edouard, N., van Dooren, H., Tinôco, I., Mosquera, J., 2015. NDIR Gas  
1284 Sensor for Spatial Monitoring of Carbon Dioxide Concentrations in Naturally Ventilated  
1285 Livestock Buildings. Sensors 15(5), 11239.
- 1286 Milone, D.H., Galli, J.R., Cangiano, C.A., Rufiner, H.L., Laca, E.A., 2012. Automatic  
1287 recognition of ingestive sounds of cattle based on hidden Markov models. Computers and  
1288 electronics in agriculture 87, 51-55.
- 1289 Mitchell, J., 2010. Small molecule immunosensing using surface plasmon resonance. Sensors  
1290 (Basel, Switzerland) 10(8), 7323-7346.
- 1291 Mitchell, J.S., Lowe, T.E., Ingram, J.R., 2009. Rapid ultrasensitive measurement of salivary  
1292 cortisol using nano-linker chemistry coupled with surface plasmon resonance detection. Analyst  
1293 134(2), 380-386.
- 1294 Mitchell, J.S., Wu, Y., Cook, C.J., Main, L., 2005. Sensitivity enhancement of surface plasmon  
1295 resonance biosensing of small molecules. Anal Biochem 343(1), 125-135.
- 1296 Montrose, A., Creedon, N., Sayers, R., Barry, S., O'riordan, A., 2015. Novel single gold  
1297 nanowire-based electrochemical immunosensor for rapid detection of bovine viral diarrhoea  
1298 antibodies in serum. Journal of Biosensors & Bioelectronics 6(3), 1-7.



1299 Mottram, T., Berry, P., Pickard, A., Hart, J.P., Pemberton, R., 2004. Non-invasive system for  
1300 monitoring physiological or health status of animals by sampling saliva. Google Patents.

1301 Mottram, T., Dobbelaar, P., Schukken, Y., Hobbs, P., Bartlett, P., 1999. An experiment to  
1302 determine the feasibility of automatically detecting hyperketonaemia in dairy cows. *Livestock*  
1303 *production science* 61(1), 7-11.

1304 Nadin, L.B., Chopa, F.S., Gibb, M.J., Trindade, J.K.d., Amaral, G.A.d., de Faccio Carvalho,  
1305 P.C., Gonda, H.L., 2012. Comparison of methods to quantify the number of bites in calves  
1306 grazing winter oats with different sward heights. *Applied Animal Behaviour Science* 139(1-2),  
1307 50-57.

1308 Nakagawa, T., Hu, H., Zharikov, S., Tuttle, K.R., Short, R.A., Glushakova, O., Ouyang, X., Feig,  
1309 D.I., Block, E.R., Herrera-Acosta, J., Patel, J.M., Johnson, R.J., 2006. A causal role for uric acid  
1310 in fructose-induced metabolic syndrome. *American journal of physiology. Renal physiology*  
1311 290(3), F625-631.

1312 Navon, S., Mizrach, A., Hetzroni, A., Ungar, E.D., 2013. Automatic recognition of jaw  
1313 movements in free-ranging cattle, goats and sheep, using acoustic monitoring. *Biosystems*  
1314 *Engineering* 114(4), 474-483.

1315 Neethirajan, S., 2017. Recent advances in wearable sensors for animal health management.  
1316 *Sensing and Bio-Sensing Research* 12, 15-29.

1317 Neethirajan, S., Weng, X., Chen, L., 2016. Biosensor for detection of subclinical ketosis. Google  
1318 Patents.

1319 Neitzel, A.-C., Stamer, E., Junge, W., Thaller, G., 2014. Calibration of an automated California  
1320 mastitis test with focus on the device-dependent variation. *Springer Plus* 3, 760.

- 1321 Niedbalski, W., 2016. Recent progress in the diagnosis of foot-and-mouth disease: rapid field-  
1322 based assays. *Medycyna Weterynaryjna* 72(6), 339-344.
- 1323 Nydegger, F., Gyga, L., Egli, W., 2010. Automatic measurement of rumination and feeding  
1324 activity using a pressure sensor. p. 027. Cemagref, Aubiere.
- 1325 Nyhan, W.L., 1997. The recognition of Lesch-Nyhan syndrome as an inborn error of purine  
1326 metabolism. *Journal of inherited metabolic disease* 20(2), 171-178.
- 1327 Ospina, P., Nydam, D., Stokol, T., Overton, T., 2010. Associations of elevated nonesterified fatty  
1328 acids and  $\beta$ -hydroxybutyrate concentrations with early lactation reproductive performance and  
1329 milk production in transition dairy cattle in the northeastern United States. *Journal of dairy*  
1330 *science* 93(4), 1596-1603.
- 1331 Oudshoorn, F.W., Cornou, C., Hellwing, A.L.F., Hansen, H.H., Munksgaard, L., Lund, P.,  
1332 Kristensen, T., 2013. Estimation of grass intake on pasture for dairy cows using tightly and  
1333 loosely mounted di- and tri-axial accelerometers combined with bite count. *Comput. Electron.*  
1334 *Agric.* 99, 227-235.
- 1335 Pahl, C., Hartung, E., Grothmann, A., Mahlkow-Nerge, K., Haeussermann, A., 2016. Suitability  
1336 of feeding and chewing time for estimation of feed intake in dairy cows. *Animal : an*  
1337 *international journal of animal bioscience* 10(9), 1507-1512.
- 1338 Park, E.-J., Werner, J., Beebe, J., Chan, S., Barrie Smith, N., 2009. Noninvasive Ultrasonic  
1339 Glucose Sensing with Large Pigs (~200 Pounds) Using a Lightweight Cymbal Transducer Array  
1340 and Biosensors. *Journal of diabetes science and technology (Online)* 3(3), 517-523.
- 1341 Park, M.-C., Ha, O.-K., 2015. Development of effective cattle health monitoring system based on  
1342 biosensors. *Advanced Science and Technology Letters* 117, 180-185.

1343 Peled, N., Ionescu, R., Nol, P., Barash, O., McCollum, M., VerCauteren, K., Koslow, M., Stahl,  
1344 R., Rhyan, J., Haick, H., 2012. Detection of volatile organic compounds in cattle naturally  
1345 infected with *Mycobacterium bovis*. *Sensors and Actuators B: Chemical* 171–172, 588-594.

1346 Pemberton, R.M., Hart, J.P., Mottram, T.T., 2001. An electrochemical immunosensor for milk  
1347 progesterone using a continuous flow system1. *Biosensors and Bioelectronics* 16(9-12), 715-723.

1348 Pereira, E.M., Naeaes, I.D.A., Garcia, R.G., 2015a. Vocalization of broilers can be used to  
1349 identify their sex and genetic strain. *Engenharia Agrícola* 35(2), 192-196.

1350 Pereira, J., Porto-Figueira, P., Cavaco, C., Taunk, K., Rapole, S., Dhakne, R., Nagarajaram, H.,  
1351 Camara, J.S., 2015b. Breath analysis as a potential and non-invasive frontier in disease  
1352 diagnosis: an overview. *Metabolites* 5(1), 3-55.

1353 Persily, A.K., 2016. Field measurement of ventilation rates. *Indoor Air* 26(1), 97-111.

1354 Piccot, S.D., Masemore, S.S., Ringler, E.S., Srinivasan, S., Kirchgessner, D.A., Herget, W.F.,  
1355 1994. Validation of a method for estimating pollution emission rates from area sources using  
1356 open-path FTIR spectroscopy and dispersion modeling techniques. *Air & Waste* 44(3), 271-279.

1357 Pritchard, G., Kirkwood, G., Sayers, A., 2002. Detecting antibodies to infectious bovine  
1358 rhinotracheitis and BVD virus infections using milk samples from individual cows. *Veterinary*  
1359 *record* 150(6), 182-183.

1360 Qandour, A., Ahmad, I., Habibi, D., Leppard, M., 2014. Remote beehive monitoring using  
1361 acoustic signals.

1362 Rahimian, M., ZamaniI, M.A., Momtaz, H., Niazi, M., 2012. Detection and phylogenetic  
1363 analysis of newcastle disease virus based on molecular techniques in broiler in Isfahan province.

1364 Research, P.M., 2014. Biosensor Market Will Reach US \$22,551.2 million in 2020. Persistence  
1365 Market Research.

- 1366 Reusch, C.E., Kley, S., Casella, M., 2006. Home monitoring of the diabetic cat. *Journal of Feline*  
1367 *Medicine & Surgery* 8(2), 119-127.
- 1368 Rose, D.P., Ratterman, M.E., Griffin, D.K., Hou, L., Kelley-Loughnane, N., Naik, R.R., Hagen,  
1369 J.A., Papautsky, I., Heikenfeld, J.C., 2015. Adhesive RFID Sensor Patch for Monitoring of  
1370 Sweat Electrolytes. *IEEE Transactions on Biomedical Engineering* 62(6), 1457-1465.
- 1371 Ruiz-Garcia, L., Lunadei, L., Barreiro, P., Robla, I., 2009. A Review of Wireless Sensor  
1372 Technologies and Applications in Agriculture and Food Industry: State of the Art and Current  
1373 Trends. *Sensors* 9(6), 4728.
- 1374 Rutter, S., Champion, R., Penning, P., 1997. An automatic system to record foraging behaviour  
1375 in free-ranging ruminants. *Applied Animal Behaviour Science* 54(2-3), 185-195.
- 1376 Rutter, S.M., 2000. Graze: A program to analyze recordings of the jaw movements of ruminants.  
1377 *Behavior Research Methods, Instruments, & Computers* 32(1), 86-92.
- 1378 Sa, J., Ju, M., Han, S., Kim, H., Chung, Y., Park, D., 2015. Detection of Low-Weight Pigs by  
1379 Using a Top-View Camera. *Proceedings of The fourth International Conference on Information*  
1380 *Science and Cloud Computing (ISCC2015)*. 18-19 December 2015. Guangzhou, China. Online  
1381 at <http://pos.sissa.it/cgi-bin/reader/conf.cgi?confid=264>, id. 24.
- 1382 Sadeghi, M., Banakar, A., Khazaei, M., Soleimani, M., 2015. An Intelligent Procedure for the  
1383 Detection and Classification of Chickens Infected by *Clostridium Perfringens* Based on their  
1384 Vocalization. *Revista Brasileira de Ciência Avícola* 17(4), 537-544.
- 1385 Salomón, F., Tropea, S., Brengi, D., Hernández, A., Alamón, D., Parra, M., Longinotti, G.,  
1386 Ybarra, G., Lloret, P., Mass, M., Roberti, M., Lloret, M., Malatto, L., Moina, C., Fraigi, L.,  
1387 Melli, L., Cortina, M.E., Serantes, D.R., Ugalde, J.E., Ciocchini, A., Comerci, D.J., 2014.

1388 Smartphone controlled platform for point-of-care diagnosis of infectious diseases. 2014 IEEE 9th  
1389 IberoAmerican Congress on Sensors, pp. 1-4.

1390 Schaefer, A.L., Cook, N.J., Bench, C., Chabot, J.B., Colyn, J., Liu, T., Okine, E.K., Stewart, M.,  
1391 Webster, J.R., 2012. The non-invasive and automated detection of bovine respiratory disease  
1392 onset in receiver calves using infrared thermography. *Research in Veterinary Science* 93(2), 928-  
1393 935.

1394 Schazmann, B., Morris, D., Slater, C., Beirne, S., Fay, C., Reuveny, R., Moyna, N., Diamond,  
1395 D., 2010. A wearable electrochemical sensor for the real-time measurement of sweat sodium  
1396 concentration. *Analytical Methods* 2(4), 342-348.

1397 Sethi, S., Nanda, R., Chakraborty, T., 2013. Clinical Application of Volatile Organic Compound  
1398 Analysis for Detecting Infectious Diseases. *Clinical microbiology reviews* 26(3), 462-475.

1399 Shao, K., Zhang, C., Ye, S., Cai, K., Wu, L., Wang, B., Zou, C., Lu, Z., Han, H., 2017. Near-  
1400 infrared electrochemiluminescence biosensor for high sensitive detection of porcine reproductive  
1401 and respiratory syndrome virus based on cyclodextrin-grafted porous Au/PtAu nanotube. *Sensors*  
1402 and Actuators B: Chemical 240, 586-594.

1403 Singh, A., Kaushik, A., Kumar, R., Nair, M., Bhansali, S., 2014. Electrochemical sensing of  
1404 cortisol: a recent update. *Applied biochemistry and biotechnology* 174(3), 1115-1126.

1405 Soltan, M.A., Tsai, Y.-L., Lee, P.-Y.A., Tsai, C.-F., Chang, H.-F.G., Wang, H.-T.T., Wilkes,  
1406 R.P., 2016. Comparison of electron microscopy, ELISA, real time RT-PCR and insulated  
1407 isothermal RT-PCR for the detection of Rotavirus group A (RVA) in feces of different animal  
1408 species. *Journal of virological methods* 235, 99-104.

1409 Soukup, M., Biesiada, I., Henderson, A., Idowu, B., Rodeback, D., Ridpath, L., Bridges, E.G.,  
1410 Nazar, A.M., Bridges, K.G., 2012. Salivary uric acid as a noninvasive biomarker of metabolic  
1411 syndrome. *Diabetology & metabolic syndrome* 4(1), 14.

1412 Spinhirne, J.P., Koziel, J.A., Chirase, N.K., 2004. Sampling and analysis of volatile organic  
1413 compounds in bovine breath by solid-phase microextraction and gas chromatography-mass  
1414 spectrometry. *Journal of chromatography. A* 1025(1), 63-69.

1415 Stein, J.E., Greco, D.S., 2002. Portable blood glucose meters as a means of monitoring blood  
1416 glucose concentrations in dogs and cats with diabetes mellitus. *Clinical techniques in small  
1417 animal practice* 17(2), 70-72.

1418 Stringer, R.C., Schommer, S., Hoehn, D., Grant, S.A., 2008. Development of an optical  
1419 biosensor using gold nanoparticles and quantum dots for the detection of Porcine Reproductive  
1420 and Respiratory Syndrome Virus. *Sensors and Actuators B: Chemical* 134(2), 427-431.

1421 Su, X., Li, S.F.Y., Liu, W., Kwang, J., 2000. Piezoelectric quartz crystal based screening test for  
1422 porcine reproductive and respiratory syndrome virus infection in pigs. *Analyst* 125(4), 725-730.

1423 Sun, Y.-F., Liu, S.-B., Meng, F.-L., Liu, J.-Y., Jin, Z., Kong, L.-T., Liu, J.-H., 2012. Metal oxide  
1424 nanostructures and their gas sensing properties: a review. *Sensors* 12(3), 2610-2631.

1425 Tani, Y., Yokota, Y., Yayota, M., Ohtani, S., 2013. Automatic recognition and classification of  
1426 cattle chewing activity by an acoustic monitoring method with a single-axis acceleration sensor.  
1427 *Computers and Electronics in Agriculture* 92, 54-65.

1428 Tarasov, A., Gray, D.W., Tsai, M.Y., Shields, N., Montrose, A., Creedon, N., Lovera, P.,  
1429 O'Riordan, A., Mooney, M.H., Vogel, E.M., 2016. A potentiometric biosensor for rapid on-site  
1430 disease diagnostics. *Biosensors & bioelectronics* 79, 669-678.

- 1431 Turner, C., Knobloch, H., Richards, J., Richards, P., Mottram, T.T.F., Marlin, D., Chambers,  
1432 M.A., 2012. Development of a device for sampling cattle breath. *Biosystems Engineering*  
1433 112(2), 75-81.
- 1434 Umemura, K., Wanaka, T., Ueno, T., 2009. Technical note: Estimation of feed intake while  
1435 grazing using a wireless system requiring no halter. *J Dairy Sci* 92(3), 996-1000.
- 1436 Ungar, E.D., Rutter, S.M., 2006. Classifying cattle jaw movements: comparing IGER behaviour  
1437 recorder and acoustic techniques. *Applied animal behaviour science* 98(1), 11-27.
- 1438 Vanrell, S.R., Chelotti, J.O., Galli, J., Rufiner, H.L., Milone, D.H., 2014. 3d acceleration for heat  
1439 detection in dairy cows. *XLIII Jornadas Argentinas de Informática e Investigación Operativa*  
1440 (43JAIO)-VI Congreso Argentino de AgroInformática (CAI)(Buenos Aires, 2014).
- 1441 Vreeburg, N., 2010a. Precision management on two Dutch dairy farms by use of Herd  
1442 Navigator., First North American Conference on Precision Dairy Management, Toronto, Canada.
- 1443 Vreeburg, N., 2010b. Precision Management On Two Dutch Dairy Farms By Use Of Herd  
1444 Navigator®. First North American Conference on Precision Dairy Management, Toronto,  
1445 Canada.
- 1446 Wang, R., Li, Y., 2013. Hydrogel based QCM aptasensor for detection of avian influenzavirus.  
1447 *Biosensors and Bioelectronics* 42, 148-155.
- 1448 Wang, R., Wang, Y., Lassiter, K., Li, Y., Hargis, B., Tung, S., Berghman, L., Bottje, W., 2009.  
1449 Interdigitated array microelectrode based impedance immunosensor for detection of avian  
1450 influenza virus H5N1. *Talanta* 79(2), 159-164.
- 1451 Waters, R.A., Fowler, V.L., Armson, B., Nelson, N., Gloster, J., Paton, D.J., King, D.P., 2014.  
1452 Preliminary validation of direct detection of foot-and-mouth disease virus within clinical samples

1453 using reverse transcription loop-mediated isothermal amplification coupled with a simple lateral  
1454 flow device for detection. *PloS one* 9(8), e105630.

1455 Wathes, C.M., Kristensen, H.H., Aerts, J.M., Berckmans, D., 2008. Is precision livestock  
1456 farming an engineer's daydream or nightmare, an animal's friend or foe, and a farmer's panacea  
1457 or pitfall? *Computers and Electronics in Agriculture* 64(1), 2-10.

1458 Wauters, A.-M., Richard- Yris, M.-A., 2002. Mutual influence of the maternal hen's food calling  
1459 and feeding behavior on the behavior of her chicks. *Developmental psychobiology* 41(1), 25-36.

1460 Weng, X., Chen, L., Neethirajan, S., Duffield, T., 2015a. Development of quantum dots-based  
1461 biosensor towards on-farm detection of subclinical ketosis. *Biosensors and Bioelectronics* 72,  
1462 140-147.

1463 Weng, X., Zhao, W., Neethirajan, S., Duffield, T., 2015b. Microfluidic biosensor for  $\beta$ -  
1464 Hydroxybutyrate ( $\beta$ HBA) determination of subclinical ketosis diagnosis. *Journal of*  
1465 *Nanobiotechnology* 13(1), 13.

1466 Wheeler, E.F., Casey, K.D., Gates, R.S., Xin, H., Zajackowski, J.L., Topper, P.A., Liang, Y.,  
1467 Pescatore, A.J., 2006. Ammonia emissions from twelve US broiler chicken houses. *Trans.*  
1468 *ASABE* 49(5), 1495-1512.

1469 Wilson, A., 2015. Advances in Electronic-Nose Technologies for the Detection of Volatile  
1470 Biomarker Metabolites in the Human Breath. *Metabolites* 5(1), 140.

1471 Wu, H., Aoki, A., Arimoto, T., Nakano, T., Ohnuki, H., Murata, M., Ren, H., Endo, H., 2015.  
1472 Fish stress become visible: A new attempt to use biosensor for real-time monitoring fish stress.  
1473 *Biosensors and Bioelectronics* 67, 503-510.

1474 Wu, S., Zhu, Y., Cai, Q., Zeng, K., Grimes, C.A., 2007. A wireless magnetoelastic  $\alpha$ -amylase  
1475 sensor. *Sensors and Actuators B: Chemical* 121(2), 476-481.



- 1476 Xu, J., Suarez, D., Gottfried, D.S., 2007. Detection of avian influenza virus using an  
1477 interferometric biosensor. *Analytical and Bioanalytical Chemistry* 389(4), 1193-1199.
- 1478 Yamaguchi, M., Matsuda, Y., Sasaki, S., Sasaki, M., Kadoma, Y., Imai, Y., Niwa, D., Shetty, V.,  
1479 2013. Immunosensor with fluid control mechanism for salivary cortisol analysis. *Biosensors &*  
1480 *bioelectronics* 41, 186-191.
- 1481 Yang, M., Caterer, N.R., Xu, W., Goolia, M., 2015. Development of a multiplex lateral flow  
1482 strip test for foot-and-mouth disease virus detection using monoclonal antibodies. *Journal of*  
1483 *virological methods* 221, 119-126.
- 1484 Yang, M., Goolia, M., Xu, W., Bittner, H., Clavijo, A., 2013. Development of a quick and simple  
1485 detection methodology for foot-and-mouth disease virus serotypes O, A and Asia 1 using a  
1486 generic RapidAssay Device. *Virology Journal* 10, 125-125.
- 1487 Yasuda, T., Yonemura, S., Tani, A., 2012. Comparison of the characteristics of small  
1488 commercial NDIR CO<sub>2</sub> sensor models and development of a portable CO<sub>2</sub> measurement device.  
1489 *Sensors* 12(3), 3641-3655.
- 1490 Ye, W.W., Tsang, M.-K., Liu, X., Yang, M., Hao, J., 2014. Upconversion Luminescence  
1491 Resonance Energy Transfer (LRET)-Based Biosensor for Rapid and Ultrasensitive Detection of  
1492 Avian Influenza Virus H7 Subtype. *Small* 10(12), 2390-2397.
- 1493 Yonemori, Y., Takahashi, E., Ren, H., Hayashi, T., Endo, H., 2009. Biosensor system for  
1494 continuous glucose monitoring in fish. *Analytica Chimica Acta* 633(1), 90-96.
- 1495 Zeidan, E., Shivaji, R., Henrich, V.C., Sandros, M.G., 2016. Nano-SPRi Aptasensor for the  
1496 Detection of Progesterone in Buffer. *Scientific Reports* 6, 26714.
- 1497 Zhao, Y., Pan, Y., Rutherford, J., Mitloehner, F.M., 2012. Estimation of the interference in  
1498 multi-gas measurements using infrared photoacoustic analyzers. *Atmosphere* 3(2), 246-265.

## **Highlights**

- Advances in the signaling strategies and data acquisition for animal health management are summarized.
- Review focuses on the systems for observing physiological parameters and health of livestock.
- Nanomaterials based development and application of biosensors for animal health are discussed.
- Advancement in non-invasive biosensing techniques for the monitoring of livestock are reviewed.

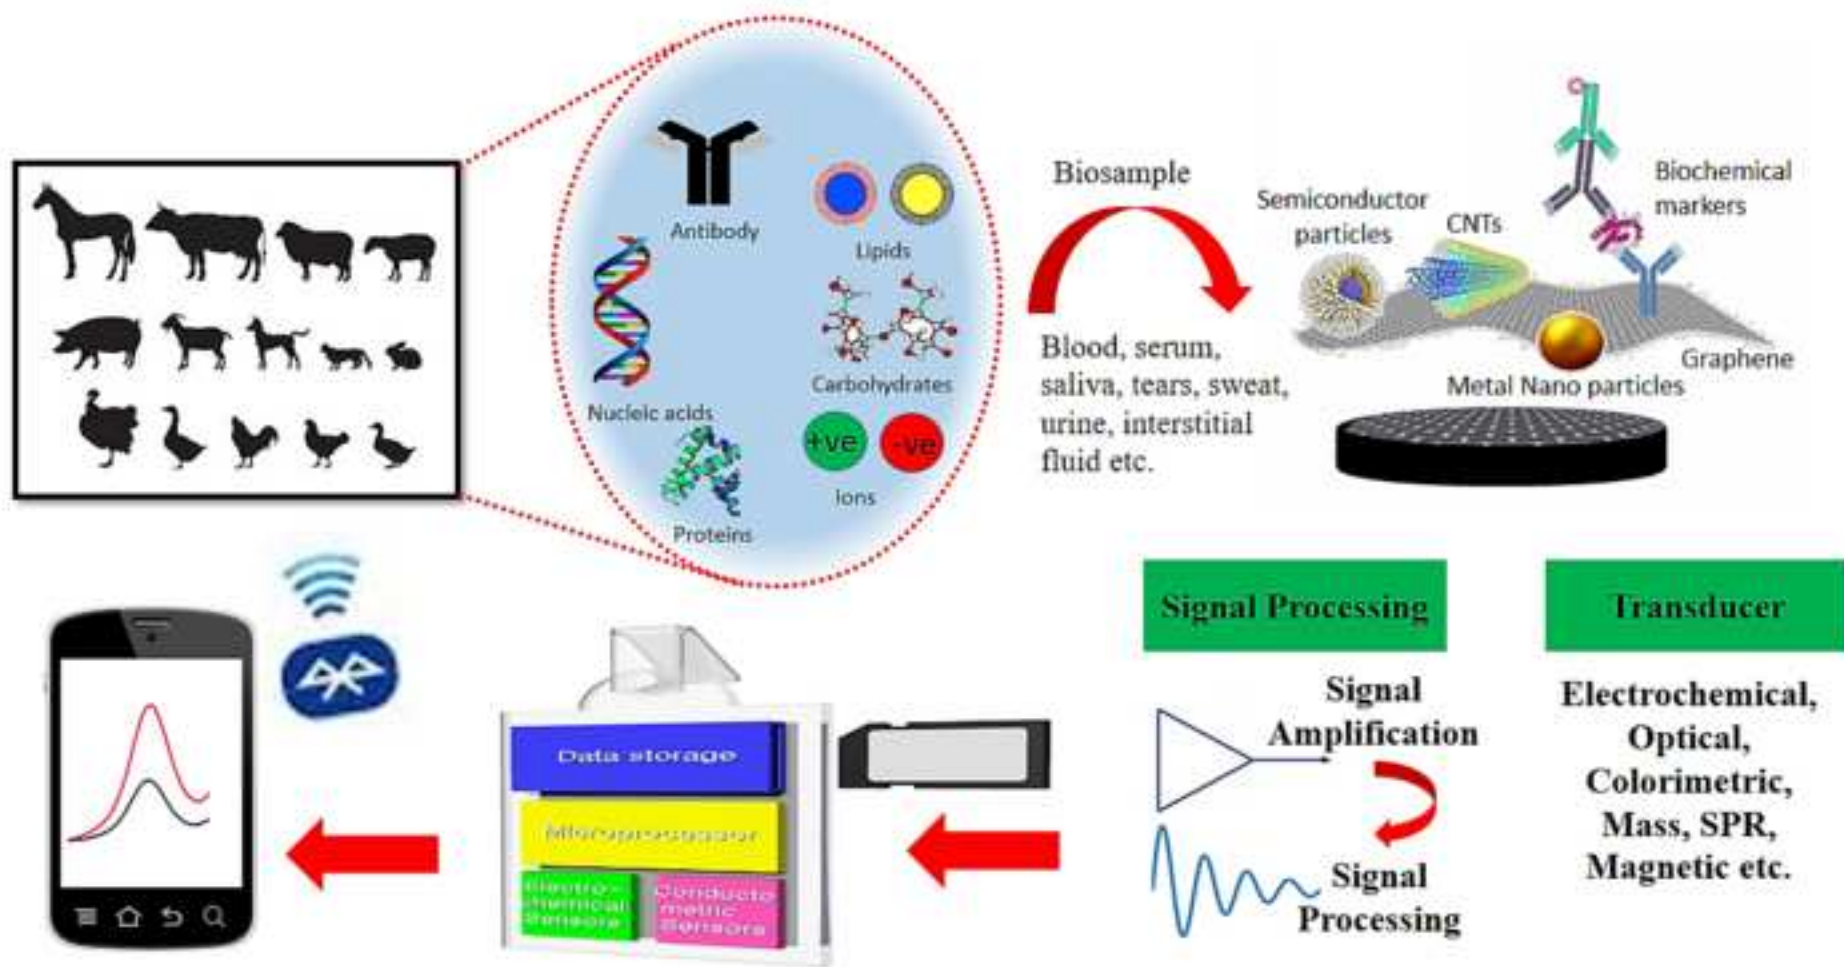

Figure 1  
Click here to download high resolution image

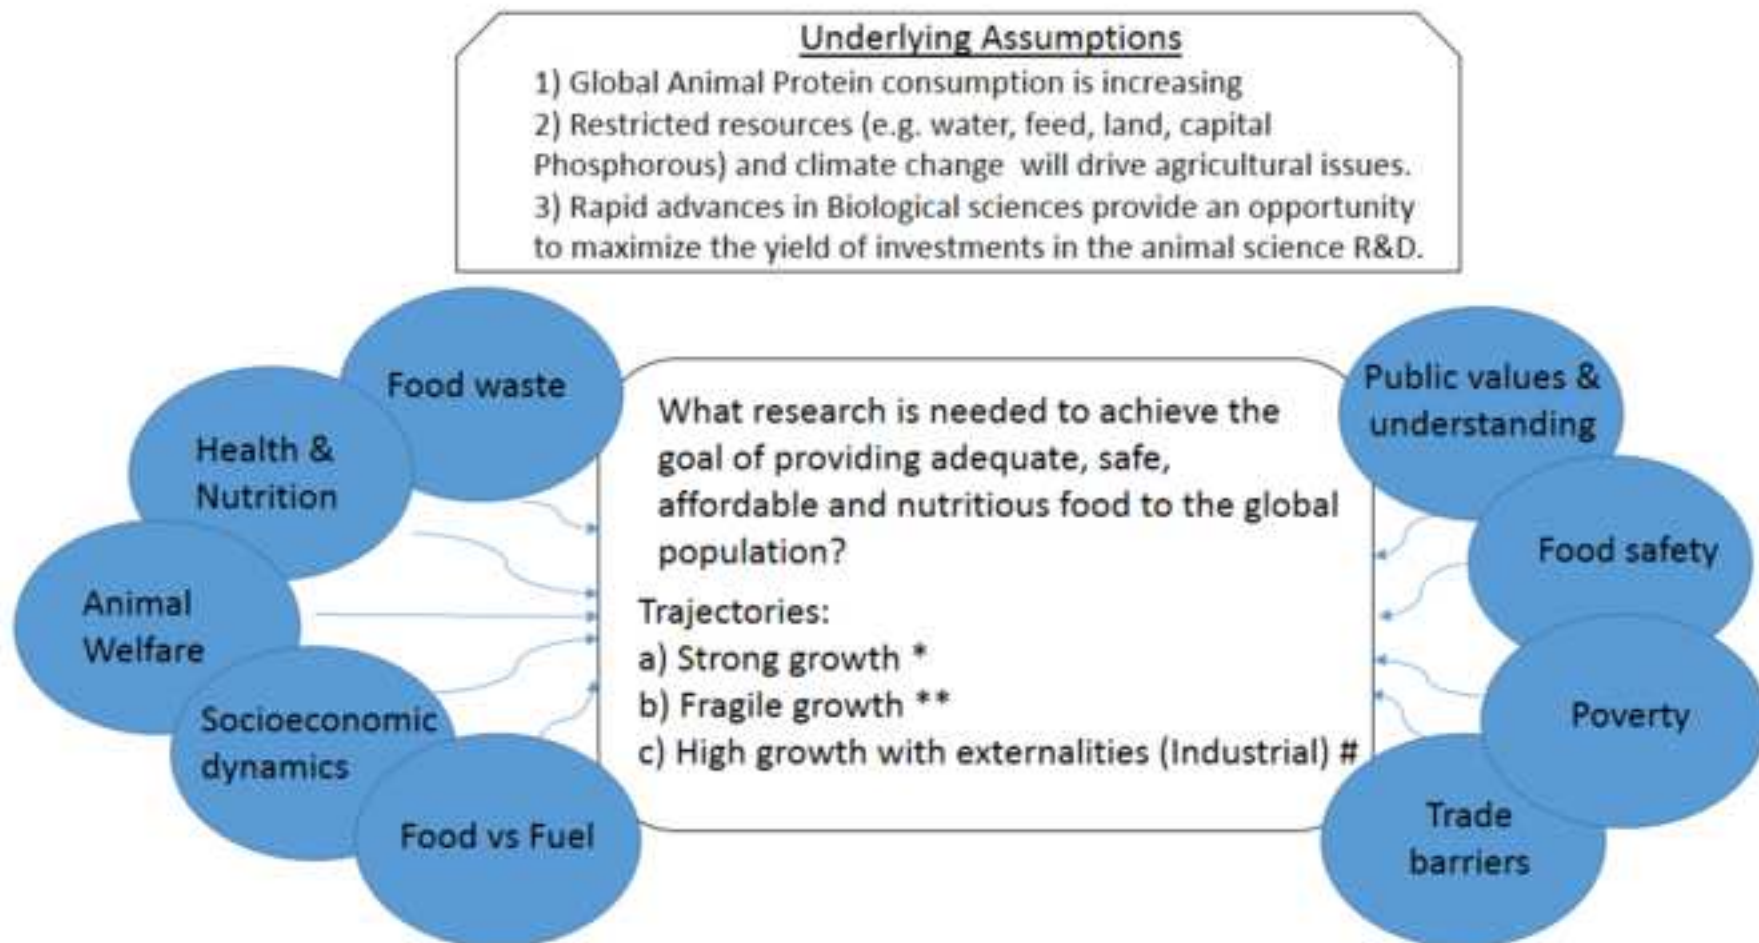

\* Intensifying and increasingly market oriented often transforming small holder systems.

\*\* where remoteness, marginal land resources or agro climatic vulnerability restrict intensification.

# Intensified livestock systems with diverse challenges including the environment and human health.

Figure 2  
[Click here to download high resolution image](#)

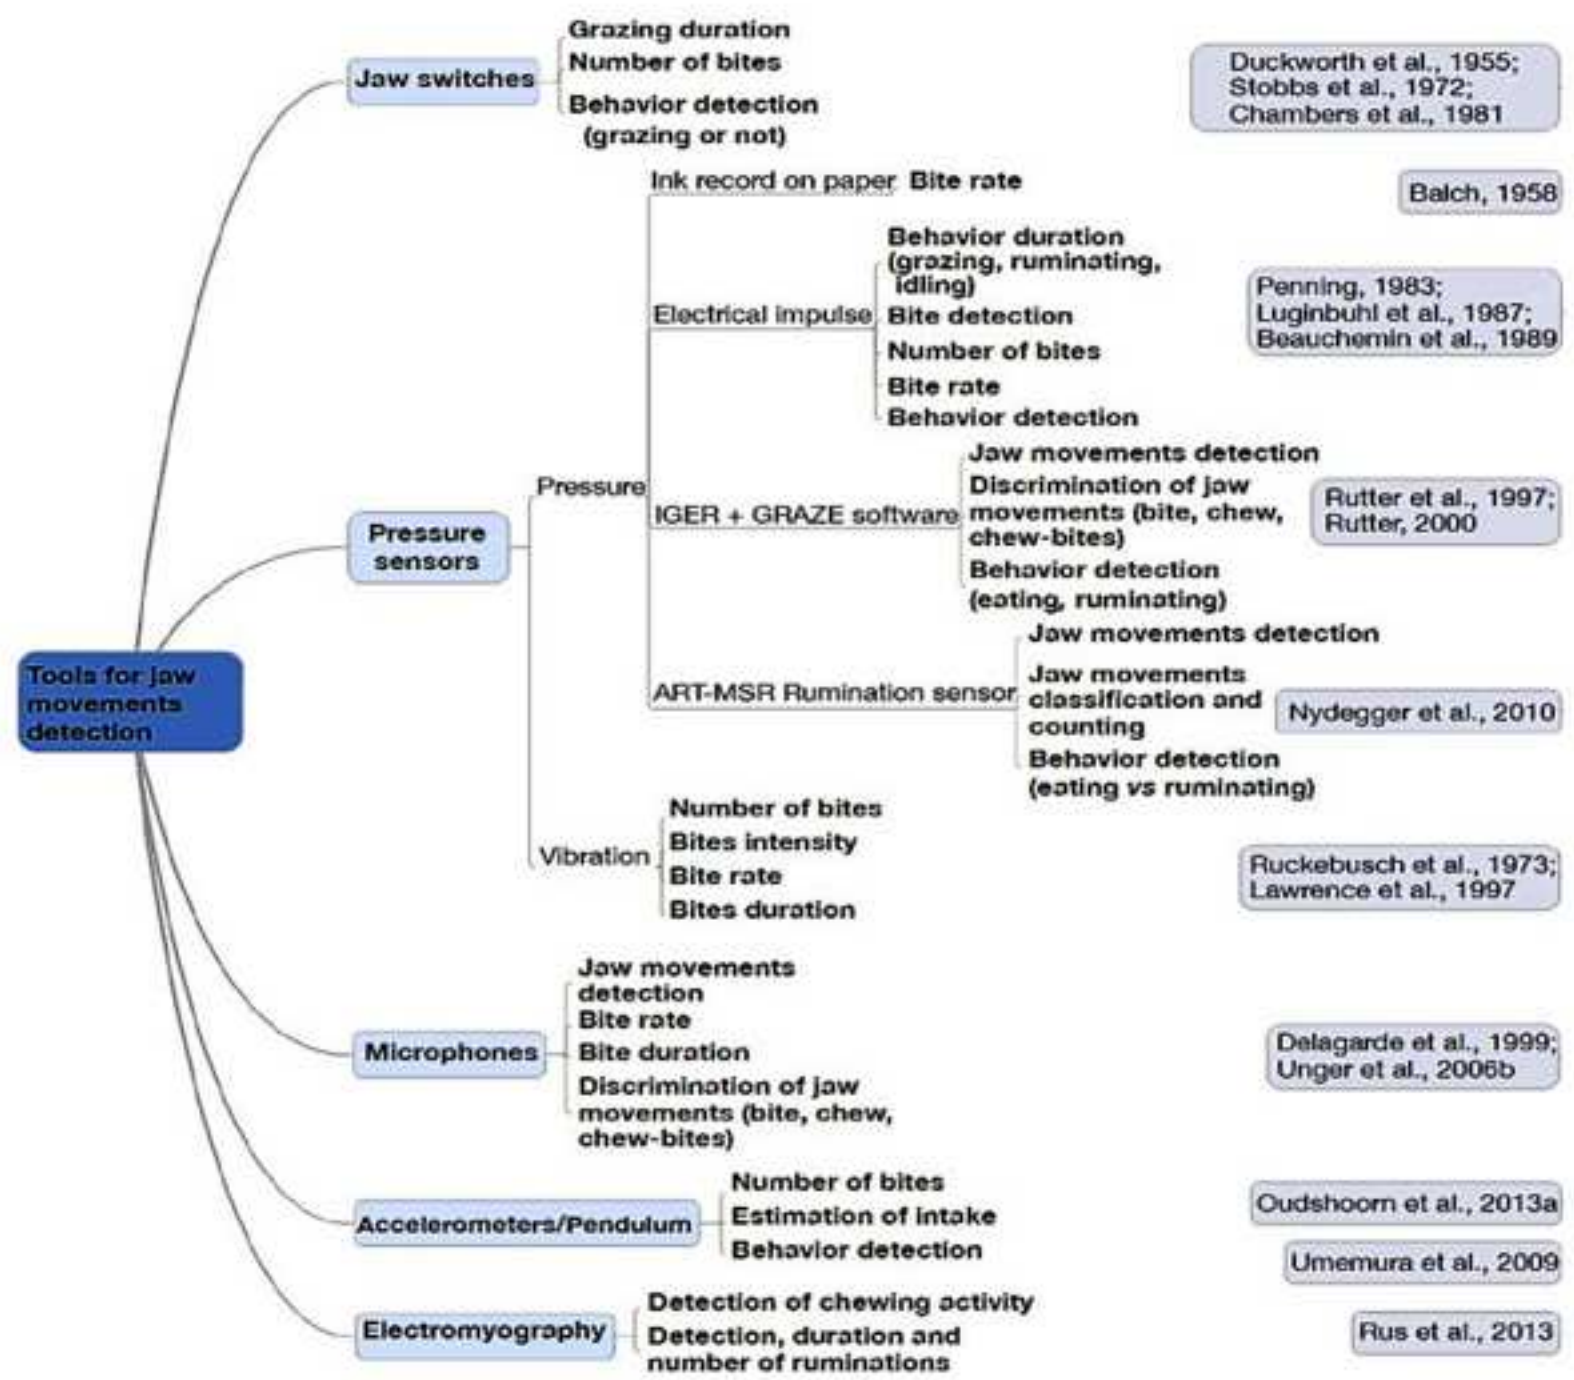

Figure 3  
[Click here to download high resolution image](#)

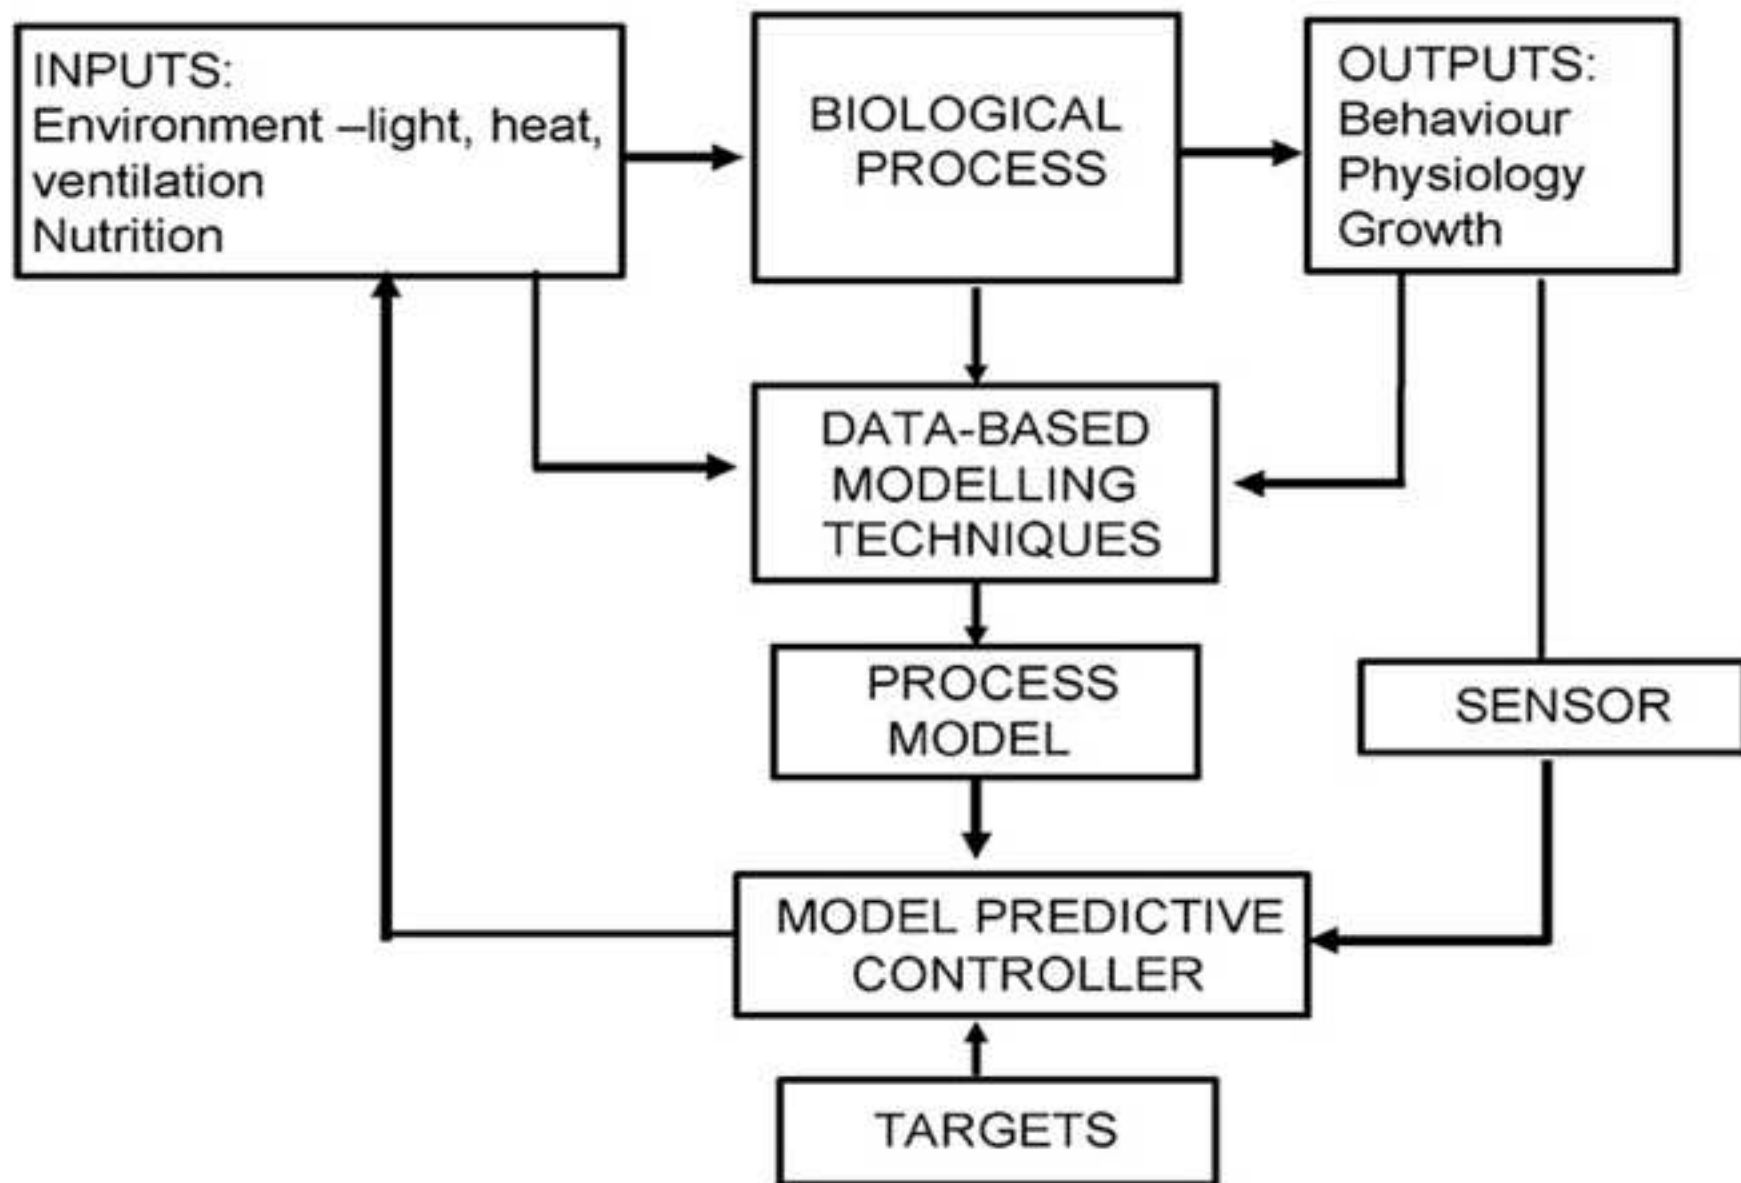

Figure 4  
[Click here to download high resolution image](#)

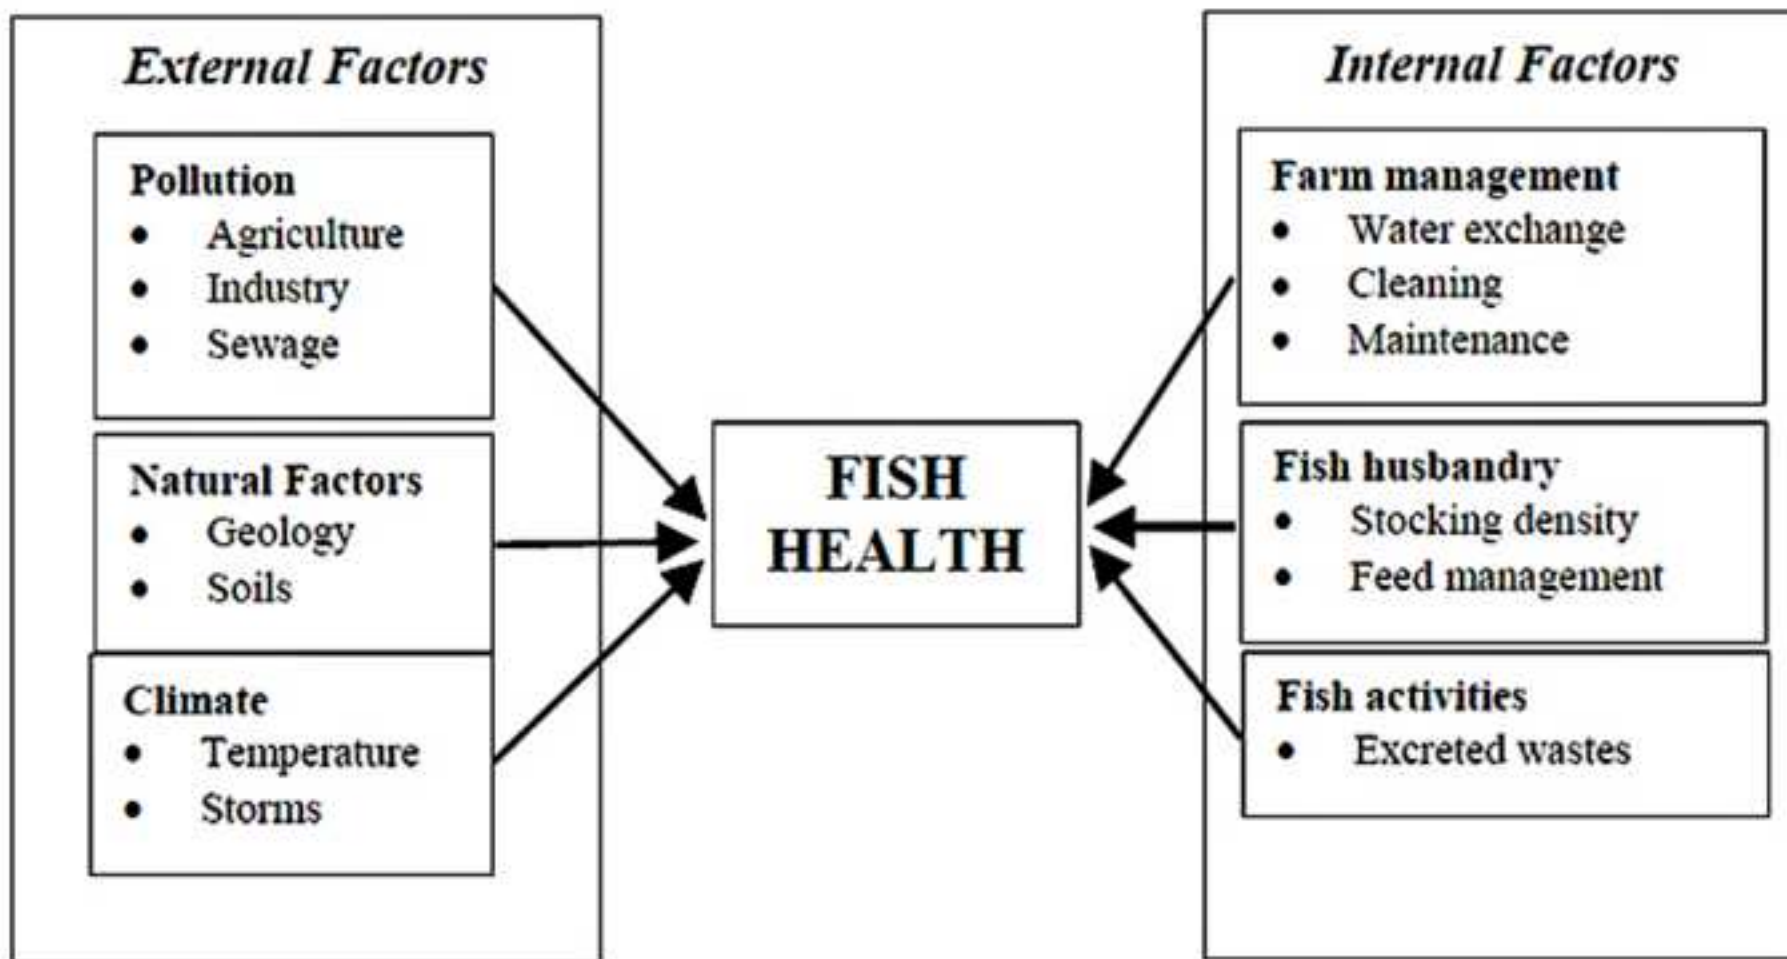

**Figure 5**  
[Click here to download high resolution image](#)

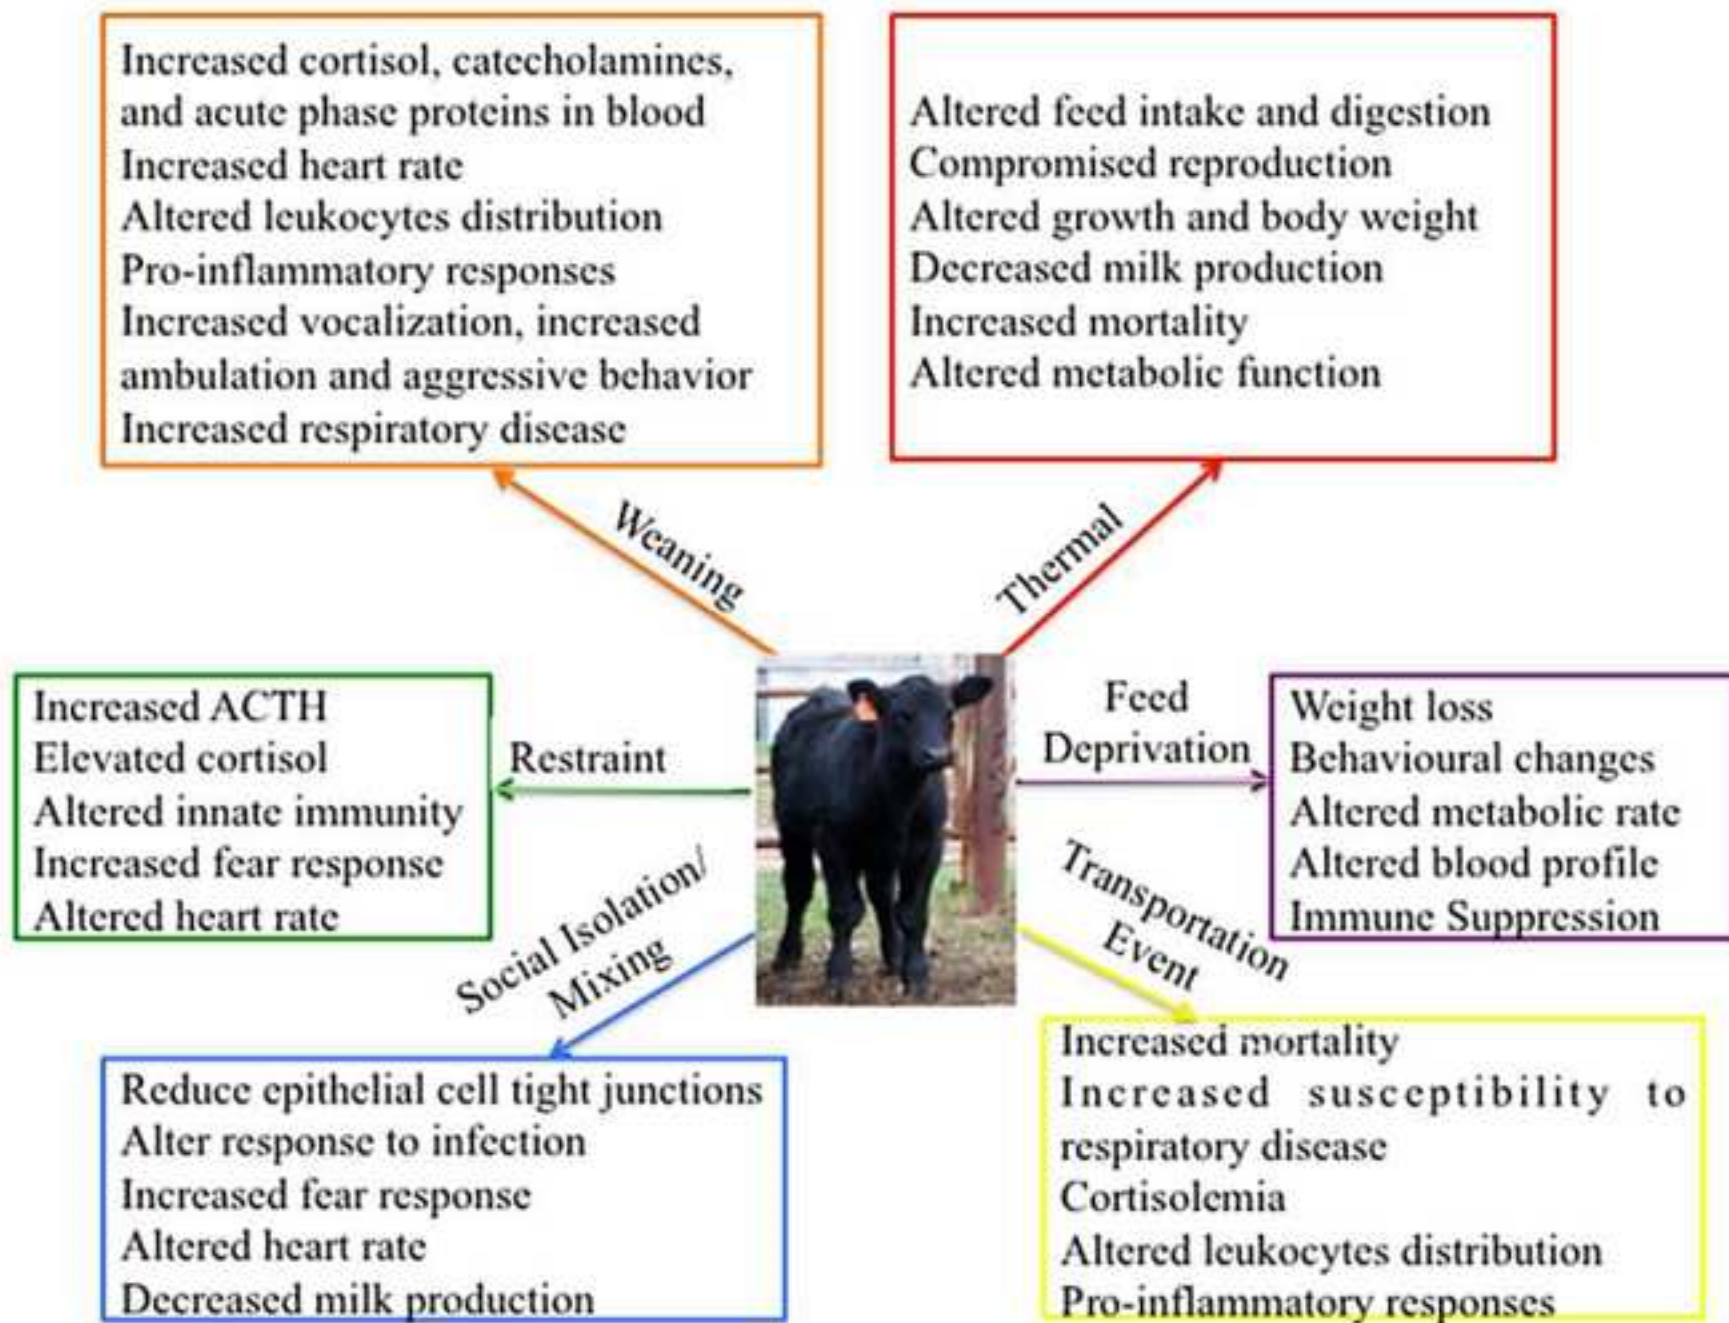



Figure 6  
[Click here to download high resolution image](#)

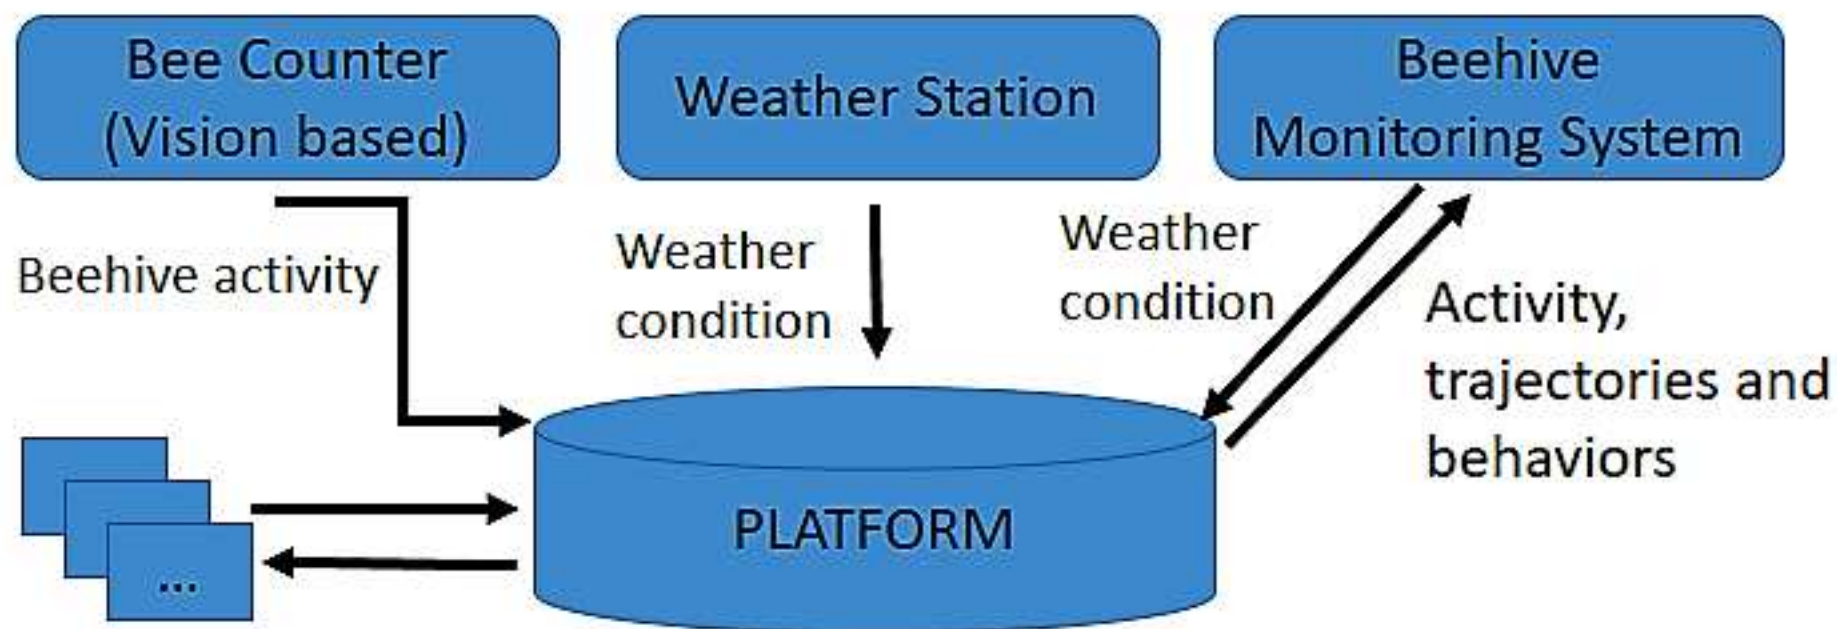

Figure 7  
[Click here to download high resolution image](#)

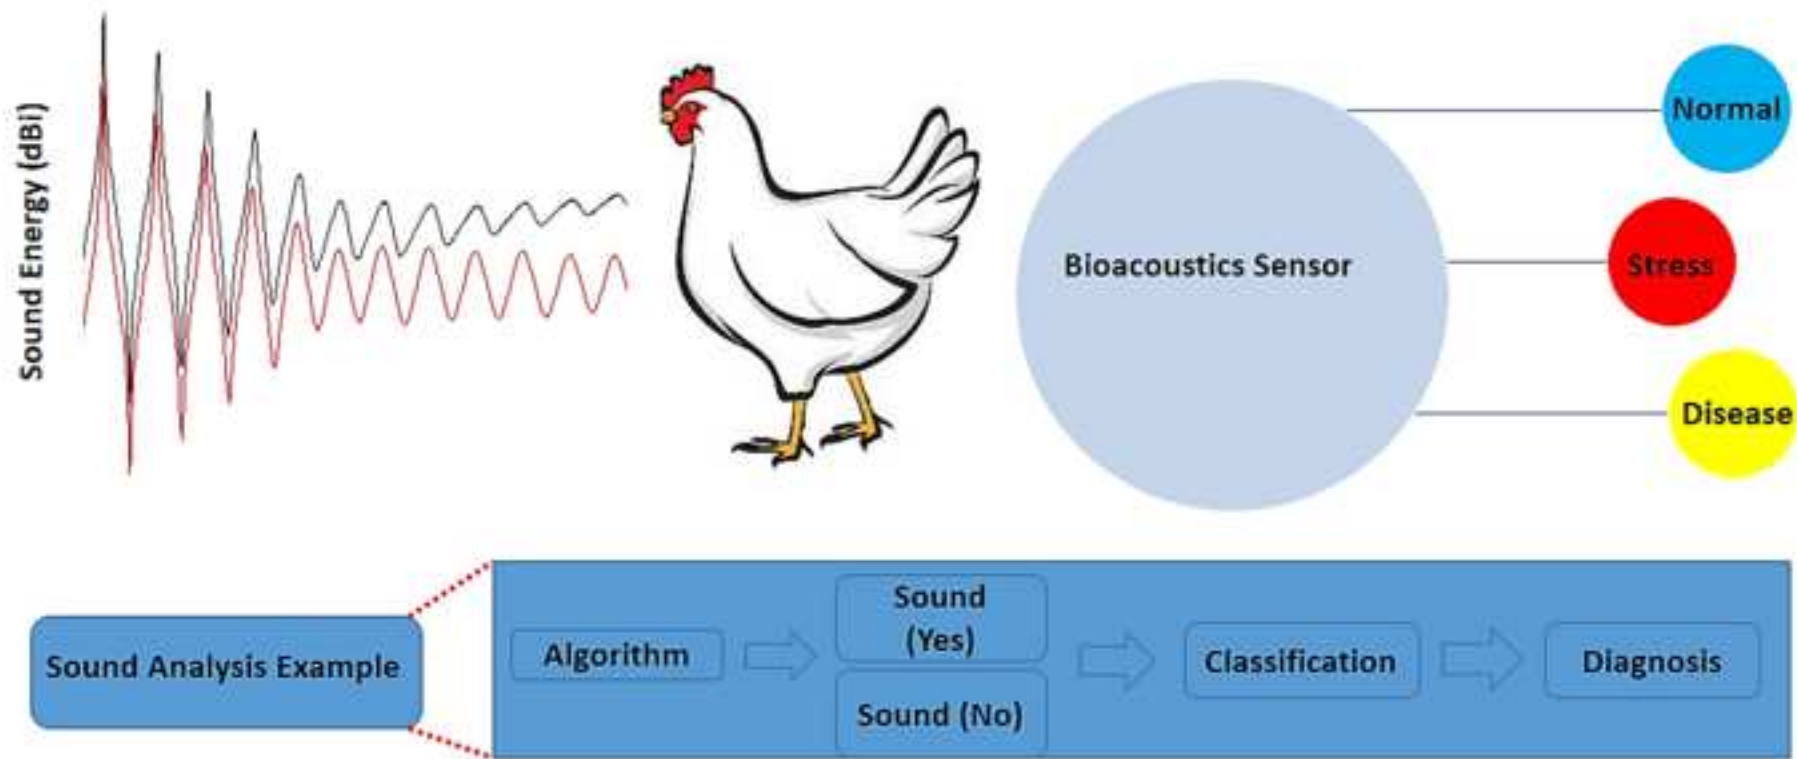

Source: http://biorxiv.org/content/10.1101/128504v1.full.pdf
